# Supplementary material for: Effect of Supplemental Irrigation on Tuber Yield, Water Use Efficiency and Nitrogen Use Efficiency of Potato (Solanum Tuberosum L.) Grown in a Mollic Andosol
Source: Research Square preprint supplement (doi:10.21203/rs.3.rs-427233/v1), 2021-04-27
Supplement: Supplementary file 1 [file 7b11e865ff96e50389ddba0b.xlsx]

## Sheet: Sheet1
		60				1	55.3333
		56				2	64.6667
		50				3	68
1		55.3333				4	64
		64				5	70.6667
		60				6	64.6667
		70				7	61.6667
2		64.6667				8	70.6667
		73				9	74.3333
		65				10	82.3333
		66				11	60.6667
3		68				12	83.3333
		66				13	77
		66				14	67.3333
		60				15	58.3333
4		64				16	71
		71				17	78
		71				18	71
		70				19	65.6667
5		70.6667				20	81.6667
		64				21	63.3333
		66				22	74.3333
		64				23	73.3333
6		64.6667				24	88
		52				25	92
		69				26	75.5
		64				27	76.5
7		61.6667				28	70.6667
		72				29	59
		70				30	55.1667
		70				31	64.3333
8		70.6667				32	63
		74				33	58.5
		74				34	62.1667
		75				35	61.1667
9		74.3333				36	58.3333
		82				37	75.5
		83				38	78.1667
		82				39	49.3333
10		82.3333				40	59.5
		64				41	76.5
		60				42	67.1667
		58				43	99.8333
11		60.6667				44	56.6667
		78				45	63.3333
		86				46	63.6667
		86				47	53.8333
12		83.3333				48	45.3333
		78
		76
		77
13		77
		60
		70
		72
14		67.3333
		60
		50
		65
15		58.3333
		70
		73
		70
16		71
		77
		78
		79
17		78
		70
		71
		72
18		71
		67
		66
		64
19		65.6667
		80
		81
		84
20		81.6667
		58
		65
		67
		63.3333
		73
		70
		80
		74.3333
		64
		74
		82
		73.3333
		83
		82
		99
		88

## Sheet: PLANT HEIGHT
	PLANT HEIGHT
	20/07/2020	13/08/2020
1	8	13	34	50	60
	6.1	14	24	46	56
	6.5	10	20	40	50
	7	7	14		10
	7.5	13	21		10
	6.5	11	25		10
2	9	11	29	54	64
	7	10	23	50	60
	4.5	11	27	60	70
	7.2	11	29		10
	6	10	31		10
	7	12	24		10
3	7.5	12	33	63	73
	8.2	15	19	55	65
	8	6	20	56	66
	6.4	15	38		10
	5	14	43		10
	6	10	32		10
4	6.4	13	35	56	66
	5	16	38	56	66
	5	21	40	50	60
	7.6	18	40		10
	8	16	33		10
	5.4	14	39		10
5	5	11	30	61	71
	5.5	15	38	61	71
	5.5	13	34	60	70
	6	12	33		10
	4.4	10	22		10
	6.5	10	33		10
6	4.5	9	35	54	64
	5.7	11	31	56	66
	4.5	10	30	54	64
	7	10	14		10
	5.8	12	34		10
	6	8	23		10
7	5	12	15		10
	5	9	22	42	52
	6	8	26	59	69
	5.4	10	29		10
	6.9	10	39	54	64
	6.8	14	34		10
8	4.6	12	37	62	72
	5.4	10	34	60	70
	6.3	10	36	60	70
	6	12	32		10
	4.5	13	21		10
	6.5	13	31		10
9	6.5	18	37	60	70
	8	21	55	64	74
	9	22	37	64	74
	7.5	12	27		10
	7	20	37		10
	7.5	15	37		10
10	6.5	17	42	72	82
	7	18	41	73	83
	8	13	38	72	82
	7	14	43	73	83
	7	19	42		10
	7	17	40		10
11	5.5	21	40	54	64
	5.5	15	40	50	60
	5	17	32	48	58
	4.5	15	35		10
	6.5	14	35		10
	3.5	13	38		10
12	4	20	38	68	78
	6	19	41	76	86
	5	18	37	76	86
	5	21	43		10
	7	14	39		10
	6	17	42		10
13	5	18	37	66	76
	6	17	40	67	77
	6.5	11	33		10
	5.5	12	40	68	78
	4	10	30		10
	2.5	11	30		10
14	5	12	30	60	70
	4.3	18	38	62	72
	5	13	30	50	60
	4	15	35		10
	4.5	10	24		10
	5	12	35		10
15	4.5	12	27	50	60
	3.5	14	32	40	50
	4	12	32	55	65
	5	12	36		10
	6.5	14	31		10
	6	13	26		10
16	8	16	36	60	70
	6	16	38	63	73
	4.5	14	27	60	70
	6.5	17	37		10
	4	10	29		10
	4.5	9	26		10
17	8.5	14	42	67	77
	6.5	14	26		10
	7	11	23		10
	6.5	15	39		10
	8	15	40	68	78
	5.5	20	44	69	79
18	9	17	39	60	70
	6.5	12	37	61	71
	7	17	41	62	72
	6.5	18	44		10
	5	17	40		10
	6	17	39		10
19	5	13	36	57	67
	6.5	15	33	56	66
	7	15	33	54	64
	4.9	16	34		10
	8	9	23		10
	7.3	16	27		10
20	5	20	38	70	80
	7	11	30		10
	8	14	32		10
	4	15	40	71	81
	7.2	18	43	74	84
	6.5	12	38		10
21	7	9	24	48	58
	4	11	24		10
	4	14	33	55	65
	3.5	14	29	57	67
	4	10	21		10
	3	7	23		10
22	7	16	40	63	73
	7	18	41	60	70
	5.8	12	23		10
	5	17	39	70	80
	6.8	14	40		10
	4.8	17	37		10
23	7.5	16	27	54	64
	5	14	36	64	74
	5	18	41	72	82
	5	19	45		10
	4.5	14	37		10
	4.6	15	39		10
24	6.5	23	45	73	83
	6.5	15	41	72	82
	7	18	46	89	99
	7.2	22	39		10
	5	23	51		10
	6.2	21	46		10

## Sheet: PLANT HEIGHT2
	28/11/20	2020-01-12	2020-12-12	19/12/20	2020-02-01
1	37	30	60	62	94		92
	30	22	61	64	80		75.5
	26	23	58	72	98		76.5
	28	18	50	64	90		70.6667
	31	21	55	60	92		59
	29	13	54	59	98		55.1667
					92		64.3333
2	25	16	50	54	78		63
	27	22	45	52	80		58.5
	30	30	51	65	93		62.1667
	29	20	53	70	50		61.1667
	22	26	58	55	74		58.3333
	20	26	41	50	78		75.5
					75.5		78.1667
3	23	12	50	40	83		49.3333
	31	13	41	53	78		59.5
	33	20	51	48	70		76.5
	21	18	48	47	90		67.1667
	27	22	46	48	76		99.8333
	29	19	48	48	62		56.6667
					76.5		63.3333
4	24	12	33	42	76		63.6667
	20	14	45	55	58		53.8333
	16	19	38	54	74		45.3333
	22	18	35	50	80
	19	23	45	51	74
	14	12	35	48	62
					70.6667
5	13	10	30	49	55
	14	14	32	40	60
	15	18	30	44	50
	19	23	42	50	67
	16	15	40	49	64
	14	18	31	45	58
					59
6	14	14	30	34	52
	12	18	25	36	50
	13	19	35	30	64
	18	10	28	54	57
	13	16	27	40	58
	12	15	25	42	50
					55.1667
7	27	25	45	62	66
	22	13	32	46	65
	18	15	38	40	58
	19	17	40	45	60
	17	16	40	50	70
	20	15	38	52	67
					64.3333
8	18	18	38	42	61
	19	20	38	40	57
	14	15	35	40	69
	18	18	40	49	53
	18	12	32	43	70
	18	21	40	48	68
					63
9	25	14	40	48	68
	16	20	30	52	58
	17	17	35	42	40
	15	16	28	49	45
	11	14	33	45	80
	28	20	35	56	60
					58.5
10	18	18	50	43	56
	19	27	31	54	64
	18	14	35	45	62
	23	18	40	45	66
	23	20	38	55	62
	22	15	38	53	63
					62.1667
11	21	20	46	50	46
	23	25	50	52	50
	24	23	40	55	57
	24	15	41	48	74
	27	21	39	35	80
	20	19	45	50	60
					61.1667
12	24	18	30	43	30
	17	16	36	33	55
	20	14	40	44	65
	15	20	41	44	67
	26	14	35	49	68
	18	10	36	47	65
					58.3333
13	24	15	50	49	70
	25	19	45	51	77
	27	18	55	57	79
	28	16	49	50	72
	19	21	51	50	76
	25	16	46	53	79
					75.5
14	23	20	40	57	70
	27	19	36	43	87
	19	21	45	40	92
	20	20	45	55	82
	18	14	43	50	60
	27	22	49	50	78
					78.1667
15	17	14	36	29	45
	21	16	36	25	46
	14	14	30	35	55
	13	12	38	30	56
	17	13	35	40	42
	12	24	38	33	52
					49.3333
16	17	18	48	40	59
	23	18	42	45	64
	16	20	33	43	58
	19	19	35	49	57
	18	18	40	42	62
	17	20	41	40	57
					59.5
17	20	17	38	49	82
	26	18	50	55	70
	25	29	45	40	98
	24	18	39	65	46
	20	16	45	50	80
	21	20	45	65	83
					76.5
18	17	16	35	45	60
	15	18	36	40	64
	20	17	30	45	72
	19	12	37	54	72
	23	15	35	45	65
	20	18	37	37	70
					67.1667
19	33	27	55	57	88
	38	30	70	59	99
	30	29	80	74	110
	40	27	65	78	116
	30	28	56	80	105
	30	30	60	72	81
					99.8333
20	17	17	25	23	44
	14	16	35	29	53
	16	15	37	35	55
	21	14	30	40	60
	19	18	35	41	58
	16	16	34	26	70
					56.6667
21	23	15	40	48	66
	18	17	35	23	54
	22	19	40	39	69
	19	20	32	40	68
	15	14	31	42	62
	19	13	30	41	61
					63.3333
22	23	16	46	42	67
	25	23	43	46	69
	19	20	40	35	55
	20	16	39	53	64
	21	24	40	43	62
	30	18	37	50	65
					63.6667
23	14	25	25	50	62
	23	17	33	42	33
	16	18	29	28	56
	17	18	30	56	60
	15	18	28	44	55
	22	21	40	39	57
					53.8333
24	17	17	45	30	52
	20	18	40	22	54
	21	22	39	40	48
	15	21	35	27	47
	16	20	38	28	34
	14	18	34	40	37
					45.3333

## Sheet: NUMBER OF BRANCHES
	NUMBER OF BRANCHES
	13/08/2020
1	6	13	16			1	13.6667
	10	10	13			2	18.6667
	3	11	12			3	18
	1	6	13.6667			4	18.6667
	5	11				5	24
	5	9				6	16.6667
2	8	15	18			7	17
	5	14	18			8	19.3333
	6	12	20			9	23.6667
	7	12	18.6667			10	25.6667
	7	10				11	14.6667
	8	9				12	21.6667
3	6	14	20			13	20.6667
	7	7	14			14	20
	0	5	20			15	17.6667
	8	14	18			16	20.6667
	9	16				17	19
	7	8				18	21
4	8	14	17			19	17
	8	13	22			20	22.6667
	9	13	17			21	20.3333
	10	14	18.6667			22	23
	8	13				23	27
	7	12				24	23.6667
5	6	12	24			25	16
	7	11	23			26	12
	7	12	25			27	12.5
	5	12	24			28	11.6667
	1	4				29	14.5
	7	14				30	11
6	3	10	16			31	13.3333
	6	13	18			32	12.3333
	6	11	16			33	13.3333
	5	7	16.6667			34	13.1667
	6	13				35	10.8333
	5	10				36	13.6667
7	4	6				37	12.3333
	3	6	22			38	14.6667
	3	8	14			39	7.33333
	7	12	15			40	11
	4	15	17			41	19.1667
	9	11				42	17.6667
8	6	12	22			43	28.6667
	5	13	21			44	14.1667
	2	8	15			45	17.5
	6	12	19.3333			46	12.8333
	4	6				47	14.3333
	6	11				48	12.5
9	8	11	26
	10	16	27
	9	11	18
	2	2	23.6667
	9	10
	6	10
10	8	11
	6	18	29
	7	10	19
	9	16	29
	7	11	25.6667
	8	13
11	6	13	16
	5	12	15
	6	9	13
	7	12	14.6667
	8	10
	5	10
12	6	12	19
	7	14	23
	10	15	23
	7	16	21.6667
	6	10
	7	15	20
13	9	16	21
	10	16	21
	5	12	20.6667
	6	14
	4	10
	4	10
14	6	14	20
	8	14	21
	8	12	19
	6	12	20
	3	10
	5	14
15	5	12	20
	7	12	18
	7	11	15
	5	15	17.6667
	5	12
	5	18
16	6	13	19
	8	14	23
	3	7	20
	5	9	20.6667
	3	10
	1	8
17	6	11	15
	4	5	20
	6	9	22
	10	14	19
	7	11
	7	13
18	8	13	20
	7	12	21
	6	12	22
	9	14	21
	5	12
	6	12
19	7	11	19
	7	10	19
	8	10	13
	4	11	17
	1	10
	7	10
20	8	14	20
	2	5	26
	8	15	22
	4	11	22.6667
	10	18
	9	13
21	1	15	19
	5	8	23
	5	11	19
	4	7	20.3333
	2	5
	0	9
22	8	16	23
	7	14	22
	2	2	24
	5	14	23
	7	14
	6	11
23	6	12	28
	6	13	26
	9	14	27
	8	11	27
	5	10
	6	10
24	8	20	30
	5	16	20
	5	16	21
	9	15	23.6667
	7	15
	10	18

## Sheet: NUMBER OF BRANCHES2
	28/11/20	2020-01-12	2020-12-12	19/12/20	2020-02-01
1	12	14	11	12	14	14		16
	8	12	9	10	12	12		12
	12	11	9	14	16	16		12.5
	12	11	10	16	20	20		11.6667
	14	10	6	14	16	16		14.5
	8	10	8	10	18	18		11
						16		13.3333
2	8	7	10	8	18	18		12.3333
	9	12	8	10	14	14		13.3333
	10	6	10	14	10	10		13.1667
	10	10	12	12	12	12		10.8333
	9	12	12	16	8	8		13.6667
	10	11	12	12	10	10		12.3333
						12		14.6667
3	7	7	13	12	17	17		7.33333
	12	6	10	10	14	14		11
	13	9	12	10	10	10		19.1667
	8	9	9	11	12	12		17.6667
	11	14	12	15	16	16		28.6667
	12	11	13	12	6	6		14.1667
						12.5		17.5
4	13	7	10	6	10	10		12.8333
	8	10	13	10	8	8		14.3333
	9	13	10	15	12	12		12.5
	12	10	8	14	16	16
	8	18	14	10	14	14
	2	10	12	12	10	10
						11.6667
5	7	5	7	8	12	12
	6	6	8	10	14	14
	9	11	6	12	17	17
	7	14	11	6	15	15
	6	8	12	8	17	17
	5	13	12	9	12	12
						14.5
6	7	6	8	6	12	12
	7	6	8	9	9	9
	8	5	11	8	11	11
	9	8	11	14	9	9
	4	4	7	9	10	10
	8	6	5	10	15	15
						11
7	10	9	16	21	16	16
	12	8	14	14	8	8
	10	8	12	10	16	16
	10	9	10	14	10	10
	9	10	11	18	14	14
	12	7	12	16	16	16
						13.3333
8	6	9	9	16	15	15
	10	9	12	7	15	15
	9	6	11	12	12	12
	9	9	12	10	13	13
	9	7	6	13	15	15
	11	10	12	14	4	4
						12.3333
9	11	4	12	10	18	18
	7	10	7	18	14	14
	10	6	12	12	6	6
	9	10	2	13	12	12
	4	5	9	10	16	16
	9	6	13	18	14	14
						13.3333
10	7	5	14	12	10	10
	8	14	9	20	13	13
	6	6	7	14	15	15
	6	6	9	12	12	12
	10	8	9	10	14	14
	11	8	10	11	15	15
						13.1667
11	8	9	15	12	5	5
	13	14	10	14	10	10
	10	9	8	18	8	8
	9	4	9	12	10	10
	7	6	16	10	14	14
	11	10	17	10	18	18
						10.8333
12	8	8	16	16	10	10
	7	6	12	12	14	14
	9	9	12	12	12	12
	5	9	14	10	16	16
	11	5	11	14	12	12
	6	6	10	6	18	18
						13.6667
13	8	8	10	10	12	12
	9	7	9	12	15	15
	11	9	11	16	20	20
	9	6	15	12	11	11
	6	10	14	10	8	8
	12	8	11	12	8	8
						12.3333
14	10	8	6	12	16	16
	9	7	8	10	12	12
	10	9	8	10	21	21
	11	10	9	14	15	15
	8	5	12	5	8	8
	10	10	10	6	16	16
						14.6667
15	8	4	10	10	5	5
	9	8	10	4	6	6
	4	6	8	9	7	7
	5	5	15	3	10	10
	9	5	8	9	6	6
	5	10	9	7	10	10
						7.33333
16	7	10	15	5	14	14
	6	9	13	12	13	13
	6	6	7	4	9	9
	7	6	13	11	8	8
	7	7	15	8	14	14
	9	11	16	8	8	8
						11
17	8	8	10	10	22	22
	10	9	15	14	20	20
	8	8	9	16	24	24
	7	8	10	16	6	6
	9	9	15	16	20	20
	7	11	12	12	23	23
						19.1667
18	5	5	8	12	12	12
	6	7	10	8	18	18
	7	9	9	12	22	22
	9	10	12	10	16	16
	10	6	9	14	18	18
	8	8	11	8	20	20
						17.6667
19	14	10	15	10	24	24
	11	14	16	14	26	26
	12	10	18	18	36	36
	13	8	12	18	36	36
	9	12	12	16	30	30
	13	11	11	16	20	20
						28.6667
20	5	5	12	4	10	10
	6	8	16	6	11	11
	7	9	10	12	12	12
	12	6	5	14	18	18
	8	7	10	6	16	16
	3	3	3	16	18	18
						14.1667
21	7	8	10	10	24	24
	4	6	9	14	12	12
	8	7	12	9	14	14
	6	9	9	9	18	18
	7	9	12	12	15	15
	8	6	12	19	22	22
						17.5
22	8	8	11	6	14	14
	10	9	12	8	7	7
	11	8	9	8	13	13
	8	8	10	12	16	16
	9	10	13	8	15	15
	8	8	11	8	12	12
						12.8333
23	5	14	10	8	16	16
	6	7	9	9	10	10
	7	8	5	12	16	16
	11	8	5	12	16	16
	4	5	9	10	13	13
	10	7	11	9	15	15
						14.3333
24	3	3	9	10	14	14
	5	6	7	8	13	13
	8	6	8	9	13	13
	5	5	5	8	15	15
	9	8	5	9	9	9
	6	7	9	14	11	11
						12.5

## Sheet: Yields
		Number of plants		Chat	C1	C2	Weird	NTP	Marketable	Non Marketable	Yield			Chat	C1	C2	weird	NTP	Marketable	Non Marketable
1	N0	19		3	#NAME?	1	1	#NAME?	0.32	0.12	0.44		1	8	10	6	3	27	1.9	0.19
	N0			5	6	1	1	13	0.502	0.17	0.672			9	4	4	4	21	1.3	0.17
	N0			8	3	1	1	13	0.316	0.2	0.516			7	5	6	4	22	1.5	0.09
				5.33333	#NAME?	1	1	#NAME?	0.379333	0.163333	0.542667			8	6.33333	5.33333	3.66667	23.3333	1.56667	0.15
2	N3	17		5	8	2	1	16	0.912	0.13	1.042		2	6	3	4	3	16	1.5	0.13			Chat	C1	C2	Weird	NTP	Marketable	Non Marketable	Yield	IRR	NITRO	marketa	yield				NUE		WUE
	N3			4	7	2	2	15	0.77	0.13	0.9			5	5	5	3	18	1.21	0.13		1	5.33333	4	1	1	11.3333	0.234333	0.163333	0.397666	RF	N0	11.1582	18.9357	12.9677				268.09	7.06318								NUE	NUE
	N3			3	1	4	2	10	0.726	0.08	0.806			3	2	3	1	9	0.83	0.08		2	4	5.33333	2.66667	1.66667	13.6667	0.400997	0.13	0.530997	RF	N3	19.0943	25.2845	31.8559	6.3488	130	0.048837	268.09	9.43134		RF	N3	31.8219	40.7107	21.0368	130	0.048837	48.837
				4	5.33333	2.66667	1.66667	13.6667	0.802667	0.113333	0.916			4.66667	3.33333	4	2.33333	14.3333	1.18	0.113333		3	3.66667	5	4	2	14.6667	0.314165	0.143333	0.457498	RF	N1	14.9596	21.7847	11.3088	2.84901	60	0.0474835	268.09	8.12588		RF	N1	22.9627	28.8886	9.21472	60	0.0474835	47.4835
3	N1	20		4	3	4	2	13	1.183	0.1	1.283		3	8	6	4	2	20	1.07	0.14		4	5	7	3.33333	2.66667	18	0.349997	0.14	0.489997	RF	N2	16.6658	23.3322	15.5391	4.39653	90	0.0488503	268.09	8.70312		RF	N2	27.5553	37.333	17.6591	90	0.0488503	48.8503
	N1			3	5	4	2	14	0.925	0.12	1.045			8	8	1	2	19	0.83	0.12		5	6.33333	8	2.33333	1.33333	18	1.03667	0.163333	1.2	FI	N3	49.363	57.1404		25.237	130	0.194131	357.47	15.9847		FI	N3	46.0736	53.3328	23.5553	130	0.194131	194.131
	N1			4	7	4	2	17	1.14	0.18	1.32			9	13	2	2	26	1.3	0.18		6	3.66667	8.33333	1.66667	0.333333	14	0.5	0.17	0.67	FI	N0	23.8085	31.9034					357.47	8.92477		FI	N2	31.5404	40.2811	10.5036	90	0.0774217	77.4217
				3.66667	5	4	2	14.6667	1.08267	0.133333	1.216			8.33333	9	2.33333	2	21.6667	1.06667	0.146667		7	10.3333	8	1.66667	1.66667	21.6667	0.709667	0.106667	0.816333	FI	N2	33.7922	38.8713		6.96795	90	0.0774217	357.47	10.874		FI	N1	26.6664	31.9997	2.2222	60	0.0198351	19.8351
4	N2	19		1	7	2	3	13	1.009	0.19	1.199		4	3	6	3	2	14	1.42	0.1		8	6	6	2.66667	1.66667	16.3333	0.574993	0.12	0.694993	FI	N1	27.3795	33.0935		1.1901	60	0.0198351	357.47	9.2577		FI	N2	39.7033	44.444	13.3332	90	0.218245	218.245
	N2			2	6	5	4	17	1.389	0.17	1.559			16	3	1	0	20	0.3	0.29		9	5.66667	9.66667	2.66667	3.33333	21.3333	0.848333	0.106667	0.955	FI	N2	40.3951	45.4742	23.8086	19.6421	90	0.218245	357.47	12.7211		FI	N1	29.9256	34.6663	3.55552	60	0.117059	117.059
	N2			12	8	3	1	24	0.907	0.3	1.207			3	2	3	1	9	0.77	0.06		10	5.66667	6	2	1.66667	15.3333	0.583332	0.106667	0.689999	FI	N1	27.7765	32.8557	15.4756	7.02354	60	0.117059	357.47	9.19117		FI	N3	38.8292	47.1255	16.0147	130	0.171361	171.361
				5	7	3.33333	2.66667	18	1.10167	0.22	1.32167			7.33333	3.66667	2.33333	1	14.3333	0.83	0.15		11	4.66667	5	3	1	13.6667	0.455832	0.0866667	0.542498	FI	N0	21.7053	25.8321	10.7138				357.47	7.22638		RF	N3	34.5182	39.1107	17.3332	130	0.100423	100.423
5	N3	20		7	9	2	1	19	0.453	0.21	0.663		5	9	8	0	0	17	0.31	0.12		12	8.66667	4	3	2	17.6667	0.873667	0.136667	1.01033	FI	N3	41.6014	48.109	19.9358	22.2769	130	0.171361	357.47	13.4582		RF	N1	21.7776	26.222	4.4444	60	0.0376966	37.6966
	N3			9	7	3	1	20	0.8	0.2	1			3	5	2	0	10	0.4	0.02		13	4.33333	8	2.33333	1.66667	16.3333	0.461664	0.13	0.591664	RF	N3	21.983	28.1732		13.0549	130	0.100423	268.09	10.5089		RF	N2	23.5553	32.8886	11.111	90	0.0727481	72.7481
	N3			3	8	2	2	15	0.763	0.08	0.843			4	5	1	0	10	0.28	0.02		14	4	7	4	2.66667	17.6667	0.264998	0.1	0.364998	RF	N1	12.6184	17.3801		2.2618	60	0.0376966	268.09	6.48293		FI	N1	37.0367	44.444	12.8888	60	0.13293	132.93
				6.33333	8	2.33333	1.33333	18	0.672	0.163333	0.835333			5.33333	6	1	0	12.3333	0.33	0.0533333		15	3.33333	7	2.33333	0.666667	13.3333	0.207498	0.11	0.317498	RF	N0	9.88043	15.1183					268.09	5.63926		FI	N2	43.407	48.8884	17.3332	90	0.242053	242.053
6	N0	20		5	5	3	0	13	0.74	0.11	0.85		6	8	8	1	0	17	0.39	0.11		16	7.33333	8.33333	1.66667	1.66667	19	0.304998	0.15	0.454998	RF	N2	14.5231	21.6656		6.54733	90	0.0727481	268.09	8.08148		FI	N3	47.9995	54.2217	22.6664	130	0.252737	252.737
	N0			1	10	1	0	12	0.633	0.3	0.933			6	7	6	0	19	0.21	0.06		17	6.66667	7	3	3	19.6667	0.56083	0.136667	0.697497	FI	N1	26.7051	33.2127	15.0737	7.97579	60	0.13293	357.47	9.29105		RF	N2	27.7034	31.9997	11.9999	90	0.0519443	51.9443
	N0			5	10	1	1	17	0.729	0.1	0.829			6	8	0	0	14	0.24	0.06		18	5.33333	5.33333	2.33333	1.66667	14.6667	0.864166	0.123333	0.987499	FI	N2	41.149	47.0217	24.5228	21.7848	90	0.242053	357.47	13.154		RF	N1	23.8516	30.2219	10.2221	60	0.00525149	5.25149
				3.66667	8.33333	1.66667	0.333333	14	0.700667	0.17	0.870667			6.66667	7.66667	2.33333	0	16.6667	0.28	0.0766667		19	3.66667	5	2	0.333333	11	0.446665	0.0833333	0.529998	FI	N0	21.2688	25.2369	7.413				357.47	7.05987		RF	N3	36.1478	39.5552	19.5554	130	0.0735054	73.5054
7	N2	18		3	7	1	2	13	0.801	0.06	0.861		7	2	6	0	0	8	0.39	0.03		20	6	3.66667	2.33333	2.66667	14.6667	1.08	0.14	1.22	FI	N3	51.4264	58.0927	30.7131	32.8558	130	0.252737	357.47	16.2511		FI	N3	60.9624	67.629	36.9626	130	0.238695	238.695
	N2			17	13	2	1	33	0.848	0.31	1.158			5	5	4	0	14	0.59	0.11		21	7	8.66667	1.33333	0	17	0.187652	0.186667	0.374319	RF	N0	8.93542	17.8239					268.09	6.64849		FI	N1	39.407	44.444	13.7776	60	0.0192429	19.2429
	N2			11	4	2	2	19	0.48	0.22	0.7			6	2	2	2	12	0.56	0.07		22	4.33333	9	3	1	17.3333	0.375831	0.0966667	0.472498	RF	N2	17.8959	22.4989		4.67499	90	0.0519443	268.09	8.3923		FI	N2	47.4069	53.9254	23.259	90	0.217362	217.362
				10.3333	8	1.66667	1.66667	21.6667	0.709667	0.196667	0.906333			4.33333	4.33333	2	0.666667	11.3333	0.513333	0.07		23	6	7	2.33333	1.66667	17	0.237602	0.143333	0.380936	RF	N1	11.3139	18.139		0.31509	60	0.00525149	268.09	6.76602		RF	N1	14.6665	17.0369	1.18517	60	0.0390197	39.0197
8	N1	18		3	5	3	0	11	0.99	0.06	1.05		8	3	3	6	0	12	0.45	0.02		24	3.33333	7	3.66667	2.33333	16.3333	0.49833	0.0766667	0.574997	RF	N3	23.729	27.3796		9.5557	130	0.0735054	268.09	10.2128		RF	N3	22.8146	25.9257	10.074	130	0.091266	91.266
	N1			0	6	3	3	12	1.031	0	1.031			5	2	7	0	14	0.5	0.03		25	8	6.33333	5.33333	3.66667	23.3333	1.19166	0.15	1.34166	FI	N3	56.7435	63.8861	36.1095	31.0303	130	0.238695	381.89	16.7289		RF	N2	17.185	18.5183	2.66664	90	0.043649	43.649
	N1			15	7	2	2	26	0.84	0.3	1.14			4	4	0	0	8	0.21	0.04		26	4.66667	3.33333	4	2.33333	14.3333	0.600914	0.113333	0.714247	FI	N1	28.6137	34.0103	15.7571	1.15458	60	0.0192429	381.89	8.90579		RF	N1	14.8147	16.8887	9.33324	60	0.11309	113.09
				6	6	2.66667	1.66667	16.3333	0.953667	0.12	1.07367			4	3	4.33333	0	11.3333	0.386667	0.03		27	8.33333	9	2.33333	2	21.6667	0.954166	0.146667	1.10083	FI	N2	45.4345	52.4183	32.5779	19.5626	90	0.217362	381.89	13.726		RF	N3	25.0368	26.9627	19.4072	130	0.13522	135.22
9	N2	19		8	9	2	3	22	1.178	0.14	1.318		9	5	0	0	0	5	0	0.06		28	7.33333	3.66667	2.33333	1	14.3333	0.54	0.15	0.69	FI	N0	25.7132	32.8557	16.9437				381.89	8.60345		RF	N2	16.148	18.222	10.6666	90	0.0912656	91.2656
	N2			7	11	4	4	26	1.324	0.14	1.464			3	3	0	0	6	0.11	0.04		29	5.33333	6	1	0	12.3333	0.33	0.0533333	0.383333	RF	N1	15.7136	18.2532		2.34118	60	0.0390197	237.7	7.67908		FI	N3	51.7032	53.3328	25.3331	130	0.233507	233.507
	N2			2	9	2	3	16	1.178	0.04	1.218			2	5	0	0	7	0.29	0.01		30	6.66667	7.66667	2.33333	0	16.6667	0.2575	0.0766667	0.334166	RF	N0	12.2614	15.912					237.7	6.69415		FI	N2	43.5551	46.6662	18.6665	90	0.257926	257.926
				5.66667	9.66667	2.66667	3.33333	21.3333	1.22667	0.106667	1.33333			3.33333	2.66667	0	0	6	0.133333	0.0366667		31	4.33333	4.33333	2	0.666667	11.3333	0.513333	0.07	0.583333	RF	N3	24.4434	27.7766		11.8646	130	0.091266	237.7	11.6856		FI	N1	27.4071	34.2219	6.22216	60	0.164676	164.676
10	N1	20		5	5	2	2	14	0.81	0.09	0.9		10	3	3	1	0	7	0.27	0.04		32	4	3	4.33333	0	11.3333	0.386667	0.03	0.416667	RF	N2	18.4119	19.8404		3.92841	90	0.043649	237.7	8.34683		FI	N2	49.1847	53.3328	21.3331	90	0.277766	277.766
	N1			9	6	2	2	19	0.763	0.17	0.933			5	4	1	0	10	0.27	0.04		33	3.33333	2.66667	0	0	6	0.200834	0.0366667	0.237501	RF	N0	9.56311	11.3091	15.4755				237.7	4.75771		FI	N1	32.5923	35.5552	3.55552	60	0.0277762	27.7762
	N1			3	7	2	1	13	0.74	0.06	0.8			4	4	3		11	0.46	0.06		34	4	3.66667	1.66667	0	9.33333	0.333333	0.0466667	0.38	RF	N1	15.8723	18.0945	18.5706	6.78539	60	0.11309	237.7	7.61231		FI	N3	47.1106	73.3326	41.3329	130	0.288261	288.261
				5.66667	6	2	1.66667	15.3333	0.771	0.106667	0.877667			4	3.66667	1.66667	0	9.33333	0.333333	0.0466667		35	4.66667	5.66667	3.33333	0	13.6667	0.563333	0.0433333	0.606667	RF	N3	26.8242	28.8876	30.4749	17.5786	130	0.13522	237.7	12.153		RF	N2	15.7035	21.4813	6.96289	90	0.0828889	82.8889
11	N0	16		2	7	3	0	12	0.57	0.06	0.63		11	4	6	4	0	14	0.67	0.02		36	6	2	2.66667	0	10.6667	0.363333	0.0466667	0.41	RF	N2	17.3008	19.523	28.2528	8.2139	90	0.0912656	237.7	8.21328		RF	N3	17.0369	23.5553	6.37031	130	0.0689838	68.9838
	N0			6	4	4	1	15	0.796	0.08	0.876			4	6	1	0	11	0.38	0.05		37	5.33333	6.33333	1	0	12.6667	1.16333	0.0366667	1.2	FI	N3	55.3944	57.1404		30.3559	130	0.233507	381.89	14.9625		RF	N1	14.5776	20.5035	3.31849	60	0.0592567	59.2567
	N0			6	4	2	2	14	0.588	0.12	0.708			6	5	5	0	16	0.64	0.06		38	4.33333	5.66667	2	0.666667	12.6667	0.98	0.07	1.05	FI	N2	46.6647	49.9978		23.2133	90	0.257926	381.89	13.0922
				4.66667	5	3	1	13.6667	0.651333	0.0866667	0.738			4.66667	5.66667	3.33333	0	13.6667	0.563333	0.0433333		39	2.66667	4.66667	4	0.333333	11.6667	0.509166	0.0533333	0.562499	FI	N0	24.245	26.7845					381.89	7.01368
12	N3	20		10	5	3	2	20	0.839	0.26	1.099		12	8	2	3	0	13	0.35	0.08		40	6.66667	9	3.33333	0	19	0.616667	0.153333	0.77	FI	N1	29.3638	36.6651		9.88056	60	0.164676	381.89	9.60096
	N3			7	5	3	1	16	0.941	0.12	1.061			6	2	3	0	11	0.31	0.03		41	5	8	3	0.666667	16.6667	1.01667	0.0933333	1.11	FI	N2	48.4106	52.8548	29.8399	24.9989	90	0.277766	381.89	13.8403
	N3			9	2	3	3	17	0.841	0.18	1.021			4	2	2	0	8	0.35	0.03		42	4	5.66667	1	1.33333	12	0.553332	0.0666667	0.619998	FI	N1	26.348	29.5225	7.55514	1.66657	60	0.0277762	381.89	7.73062
				8.66667	4	3	2	17.6667	0.873667	0.186667	1.06033			6	2	2.66667	0	10.6667	0.336667	0.0466667		43	8.66667	6.33333	2.66667	2.66667	20.3333	1.16	0.211984	1.37198	FI	N3	55.2357	65.3297	37.95	37.4739	130	0.288261	381.89	17.107
13	N3	20		2	5	4	2	13	1.15	0.04	1.19		13	5	5	3	0	13	0.66	0.03		44	5	5	2.66667	1.33333	14	0.501665	0.0833333	0.584999	FI	N0	23.8878	27.8559	5.88857				381.89	7.29422
	N3			7	8	2	1	18	0.839	0.17	1.009			7	5	0	0	12	0.3	0.02		45	9	7.66667	0	0	16.6667	0.353333	0.13	0.483333	RF	N2	16.8247	23.0149		7.46	90	0.0828889	237.7	9.68232
	N3			4	11	1	2	18	0.641	0.1	0.741			4	9	0	0	13	0.47	0.06		46	9	3.33333	0.333333	1	13.6667	0.428334	0.146667	0.575	RF	N3	20.396	27.3798		8.96789	130	0.0689838	237.7	11.5186
				4.33333	8	2.33333	1.66667	16.3333	0.876667	0.103333	0.98			5.33333	6.33333	1	0	12.6667	0.476667	0.0366667		47	13	3.66667	0	0	16.6667	0.196667	0.19	0.386667	RF	N0	9.36468	18.4119					237.7	7.74586
14	N1	18		6	6	3	2	17	0.792	0.15	0.942		14	5	7	4	1	17	1.11	0.08		48	8.33333	6	0	1.66667	16	0.328	0.133333	0.461333	RF	N1	15.6184	21.9673		3.5554	60	0.0592567	237.7	9.24161
	N1			3	9	4	3	19	1.055	0.08	1.135			0	6	1	1	8	0.59
	N1			3	6	5	3	17	1.105	0.07	1.175			8	4	1	0	13	0.47	0.13
				4	7	4	2.66667	17.6667	0.984	0.1	1.084			4.33333	5.66667	2	0.666667	12.6667	0.723333	0.07
15	N0	20		4	7	2	0	13	0.734	0.1	0.834		15	5	6	6	0	17	1	0.09
	N0			3	8	2	1	14	0.777	0.07	0.847			0	5	3	0	8	0.58
	N0			3	6	3	1	13	0.634	0.07	0.704			3	3	3	1	10	0.77	0.07
				3.33333	7	2.33333	0.666667	13.3333	0.715	0.08	0.795			2.66667	4.66667	4	0.333333	11.6667	0.783333	0.0533333
16	N2	20		9	5	2	3	19	0.517	0.23	0.747		16	7	12	5	0	24	1.23	0.13
	N2			5	7	2	1	15	0.733	0.19	0.923			7	8	3	0	18	0.82	0.19
	N2			8	13	1	1	23	0.9	0.21	1.11			6	7	2	0	15	0.72	0.14
				7.33333	8.33333	1.66667	1.66667	19	0.716667	0.21	0.926667			6.66667	9	3.33333	0	19	0.923333	0.153333
17	N1	17		7	6	2	2	17	0.83	0.17	1		17	9	6	4	1	20	0.81	0.15
	N1			6	4	3	3	16	0.975	0.13	1.105			6	10	3	0	19	0.74	0.13
	N1			7	11	4	4	26	1.277	0.2	1.477			0	8	2	1	11	0.93	0
				6.66667	7	3	3	19.6667	1.02733	0.166667	1.194			5	8	3	0.666667	16.6667	0.826667	0.0933333
18	N2	19		6	7	4	2	19	1.369	0.14	1.509		18	1	5	0	3	9	0.72	0.01
	N2			5	3	1	2	11	0.653	0.12	0.773			6	8	2	1	17	0.88	0.08
	N2			5	6	2	1	14	0.68	0.11	0.79			5	4	1	0	10	0.36	0.11
				5.33333	5.33333	2.33333	1.66667	14.6667	0.900667	0.123333	1.024			4	5.66667	1	1.33333	12	0.653333	0.0666667
19	N0	16		4	1	2	0	7	0.945	0.08	1.025		19	3	4	1	5	13	1.32	0.02
	N0			0	9	2	0	11	0.589	0	0.589			12	9	3	2	26	0.86	0.89
	N0			7	5	2	1	15	0.911	0.17	1.081			11	6	4	1	22	1	0.86
				3.66667	5	2	0.333333	11	0.815	0.0833333	0.898333			8.66667	6.33333	2.66667	2.66667	20.3333	1.06	0.59
20	N3	20		6	4	2	3	15	0.766	0.12	0.886		20	2	6	4	3	15	1.1	0.06
	N3			8	5	3	2	18	0.83	0.17	1			4	4	1	1	10	0.53	0.06
	N3			4	2	2	3	11	0.87	0.13	1			9	5	3	0	17	0.58	0.13
				6	3.66667	2.33333	2.66667	14.6667	0.822	0.14	0.962			5	5	2.66667	1.33333	14	0.736667	0.0833333
21	N0	19		5	11	3	0	19	0.85	0.14	0.99		21	6	7	0	0	13	0.37	0.14
	N0			8	5	1	0	14	0.273	0.19	0.463			12	7	0	0	19	0.25	0.11
	N0			8	10	0	0	18	0.447	0.23	0.677			9	9	0	0	18	0.44	0.14
				7	8.66667	1.33333	0	17	0.523333	0.186667	0.71			9	7.66667	0	0	16.6667	0.353333	0.13
22	N2	20		4	10	4	1	19	1.156	0.1	1.256		22	10	4	0	0	14	0.2	0.12
	N2			7	6	5	2	20	1.01	0.16	1.17			5	2	0	3	10	0.57	0.11
	N2			2	11	0	0	13	0.599	0.03	0.629			12	4	1	0	17	0.38	0.21
				4.33333	9	3	1	17.3333	0.921667	0.0966667	1.01833			9	3.33333	0.333333	1	13.6667	0.383333	0.146667
23	N1	20		9	10	0	2	21	0.743	0.22	0.963		23	11	5	0	0	16	0.23	0.16
	N1			7	7	3	1	18	0.893	0.17	1.063			9	6	0	0	15	0.36	0.12
	N1			2	4	4	2	12	0.842	0.04	0.882			19	0	0	0	19		0.29
				6	7	2.33333	1.66667	17	0.826	0.143333	0.969333			13	3.66667	0	0	16.6667	0.196667	0.19
24	N3	19		0	5	5	3	13	1.186	0	1.186		24	1	3	0	5	9	1.2	0.01
	N3			4	4	4	3	15	1.033	0.1	1.133			12	7	0	0	19	0.4	0.17
	N3			6	12	2	1	21	1.067	0.13	1.197			12	8	0	0	20	0.44	0.22
				3.33333	7	3.66667	2.33333	16.3333	1.09533	0.0766667	1.172			8.33333	6	0	1.66667	16	0.68	0.133333

## Sheet: Yields2
	Chat	C1	C2	weird	NTP	Marketable	Non Marketable
1	8	10	6	3	27	1.9	0.19
	9	4	4	4	21	1.3	0.17
	7	5	6	4	22	1.5	0.09
2	6	3	4	3	16	1.5	0.13
	5	5	5	3	18	1.21	0.13
	3	2	3	1	9	0.83	0.08
3	8	6	4	2	20	1.07	0.14
	8	8	1	2	19	0.83	0.12
	9	13	2	2	26	1.3	0.18
4	3	6	3	2	14	1.42	0.1
	16	3	1	0	20	0.3	0.29
	3	2	3	1	9	0.77	0.06
5	9	8	0	0	17	0.31	0.12
	3	5	2	0	10	0.4	0.02
	4	5	1	0	10	0.28	0.02
6	8	8	1	0	17	0.39	0.11
	6	7	6	0	19	0.21	0.06
	6	8	0	0	14	0.24	0.06
7	2	6	0	0	8	0.39	0.03
	5	5	4	0	14	0.59	0.11
	6	2	2	2	12	0.56	0.07
8	3	3	6	0	12	0.45	0.02
	5	2	7	0	14	0.5	0.03
	4	4	0	0	8	0.21	0.04
9	5	0	0	0	5	0	0.06
	3	3	0	0	6	0.11	0.04
	2	5	0	0	7	0.29	0.01
10	3	3	1	0	7	0.27	0.04
	5	4	1	0	10	0.27	0.04
	4	4	3		11	0.46	0.06
11	4	6	4	0	14	0.67	0.02
	4	6	1	0	11	0.38	0.05
	6	5	5	0	16	0.64	0.06
12	8	2	3	0	13	0.35	0.08
	6	2	3	0	11	0.31	0.03
	4	2	2	0	8	0.35	0.03
13	5	5	3	0	13	0.66	0.03
	7	5	0	0	12	0.3	0.02
	4	9	0	0	13	0.47	0.06
14	5	7	4	1	17	1.11	0.08
	0	6	1	1	8	0.59
	8	4	1	0	13	0.47	0.13
15	5	6	6	0	17	1	0.09
	0	5	3	0	8	0.58
	3	3	3	1	10	0.77	0.07
16	7	12	5	0	24	1.23	0.13
	7	8	3	0	18	0.82	0.19
	6	7	2	0	15	0.72	0.14
17	9	6	4	1	20	0.81	0.15
	6	10	3	0	19	0.74	0.13
	0	8	2	1	11	0.93
18	1	5	0	3	9	0.72	0.01
	6	8	2	1	17	0.88	0.08
	5	4	1	0	10	0.36	0.11
19	3	4	1	5	13	1.32	0.02
	12	9	3	2	26	0.86	0.89
	11	6	4	1	22	1	0.86
20	2	6	4	3	15	1.1	0.06
	4	4	1	1	10	0.53	0.06
	9	5	3	0	17	0.58	0.13
21	6	7	0	0	13	0.37	0.14
	12	7	0	0	19	0.25	0.11
	9	9	0	0	18	0.44	0.14
22	10	4	0	0	14	0.2	0.12
	5	2	0	3	10	0.57	0.11
	12	4	1	0	17	0.38	0.21
23	11	5	0	0	16	0.23	0.16
	9	6	0	0	15	0.36	0.12
	19	0	0	0	19		0.29
24	1	3	0	5	9	1.2	0.01
	12	7	0	0	19	0.4	0.17
	12	8	0	0	20	0.44	0.22

## Sheet: BIOMASS
1	0.24		0.3	14.2851	1.3	0.65
	0.36		0.45	21.4276	1.7	0.85
	0.3		0.518	24.6656	1.8	0.9
2	0.5		0.688	32.7605	1.77	0.885
	0.4		0.746	35.5223	0.78	0.39
	0.45		0.4415	21.0229	0.8	0.4
3	0.497		0.5	23.8085	0.93	0.465
	0.539		0.5	23.8085	0.91	0.455
	0.518		0.6	28.5702	1.07	0.535
4	0.526		0.45	21.4276	1.31	0.655
	0.85		0.37	17.6183	1.56	0.78
	0.688		0.711	33.8557	1.48	0.74
5	0.78		0.7	33.3319	1.76	0.88
	0.712		0.5	23.8085	1.72	0.86
	0.746		0.34	16.1898	0.61	0.305
6	0.423		0.574	27.3322	1.52	0.76
	0.46		0.6405	30.4987	1.58	0.79
	0.4415		0.45	21.4276	1.38	0.69
7	0.46		0.5	23.8085	3.12	1.56
	0.54		0.615	29.2845	1.92	0.96
	0.5		0.4135	19.6896	1.22	0.61
8	0.4		0.55	26.1894	0.95	0.475
	0.6		0.6	28.5702	1.04	0.52
	0.5		0.745	35.4747	1.06	0.53
9	0.6		0.65	30.951
	0.6		0.85	40.4744
	0.6		0.9	42.8553
10	0.4		0.885	42.141
	0.5		0.39	18.5706
	0.45		0.4	19.0468
11	0.3		0.465	22.1419
	0.44		0.455	21.6657
	0.37		0.535	25.4751
12	0.712		0.655	31.1891
	0.71		0.78	37.1413
	0.711		0.74	35.2366
13	0.7		0.88	41.903
	0.7		0.86	40.9506
	0.7		0.305	14.5232
14	0.5		0.76	36.1889
	0.5		0.79	37.6174
	0.5		0.69	32.8557
15	0.4		1.56	74.2825
	0.28		0.96	45.7123
	0.34		0.61	29.0464
16	0.5		0.475	22.6181
	0.648		0.52	24.7608
	0.574		0.53	25.237
17	0.648
	0.633
	0.6405
18	0.5
	0.4
	0.45
19	0.6
	0.4
	0.5
20	0.6
	0.63
	0.615
21	0.4
	0.427
	0.4135
22	0.5
	0.6
	0.55
23	0.8
	0.4
	0.6
24	0.78
	0.71
	0.745

## Sheet: BIOMASS2
1	1.3
2	1.7
3	1.8
4	1.77
5	0.78
6	0.8
7	0.93
8	0.91
9	1.07
10	1.31
11	1.56
12	1.48
13	1.76
14	1.72
15	0.61
16	1.52
17	1.58
18	1.38
19	3.12
20	1.92
21	1.22
22	0.95
23	1.04
24	1.06

## Sheet: Sheet3
	SEA	REP	IRR	NITRO	TBY	ABIO	TB	HI	NTP	WUE	PLH	NBRANCHES	Marketable	TotalYIELD		SEA	REP	IRR	NITRO	NUE					NUE		SEA	REP	NITRO	IWUE							SEA	REP	IRR	NITRO
1	1	1	RF	N0	18.9357	14.2851	33.2208	56.9995	11.3333	7.33853	55.3333	13.6667	11.1582	18.9357		1	1	RF	N3	88.837	48.837	88.837	130	48.837	150.822		1	1	N0	14.191							1	1	RF	N0	25.8402
2	1	1	RF	N3	25.2845	21.4276	46.7121	54.1283	13.6667	15.1855	64.6667	18.6667	19.0943	25.2845		1	1	RF	N1	47.4835	47.4835	47.4835	60	47.4835	77.9		1	1	N3	34.8609							1	1	RF	N3	43.6172
3	1	1	RF	N1	21.7847	24.6656	46.4503	46.8989	14.6667	10.7757	68	18	14.9596	21.7847		1	1	RF	N2	59.8503	48.8503	59.8503	90	48.8503	146.212		1	1	N1	12.3756							1	1	RF	N1	57.9023
4	1	1	RF	N2	23.3322	32.7605	56.0927	41.5958	18	13.9255	64	18.6667	16.6658	23.3322		1	1	FI	N3	194.131	194.131	194.131	130	194.131	181.195		1	1	N2	17.005							1	1	RF	N2	62.9338
5	1	1	FI	N3	57.1404	35.5223	92.6627	61.665	18	14.9195	70.6667	24	49.363	57.1404		1	1	FI	N2	177.422	177.422	177.422	90	77.4217	116.707		1	2	N2	26.0545							1	1	FI	N3	39.7761
6	1	1	FI	N0	31.9034	21.0229	52.9263	60.2789	14	8.33006	64.6667	16.6667	23.8085	31.9034		1	1	FI	N1	98.8351	119.835	98.8351	60	19.8351	190.7		1	2	N1	16.9354							1	1	FI	N0	41.4585
7	1	1	FI	N2	38.8713	23.8085	62.6798	62.0157	21.6667	11.2684	61.6667	17	33.7922	38.8713		1	2	FI	N2	198.245	218.245	198.245	90	218.245	148.147		1	2	N0	11.7245							1	1	FI	N2	43.1569
8	1	1	FI	N1	33.0935	23.8085	56.902	58.1588	16.3333	8.95171	70.6667	19.3333	27.3795	33.0935		1	2	FI	N1	117.059	117.059	117.059	60	117.059	197.88		1	2	N3	21.8164							1	1	FI	N1	51.1248
9	1	2	FI	N2	45.4742	28.5702	74.0444	61.4148	21.3333	12.4329	74.3333	23.6667	40.3951	45.4742		1	2	FI	N3	211.361	171.361	211.361	130	171.361	173.19		1	3	N1	16.4956							1	2	FI	N2	63.4893
10	1	2	FI	N1	32.8557	21.4276	54.2833	60.5263	15.3333	9.69769	82.3333	25.6667	27.7765	32.8557		1	2	RF	N3	100.423	100.423	100.423	130	100.423	159.332		1	3	N2	26.8361							1	2	FI	N1	41.7919
11	1	2	FI	N0	25.8321	17.6183	43.4504	59.452	13.6667	8.70305	60.6667	14.6667	21.7053	25.8321		1	2	RF	N1	37.6966	37.6966	37.6966	60	37.6966	74.0733		1	3	N0	8.11228							1	2	FI	N0	35.1413
12	1	2	FI	N3	48.109	33.8557	81.9647	58.6948	17.6667	13.1831	83.3333	21.6667	41.6014	48.109		1	2	RF	N2	72.7481	72.7481	72.7481	90	72.7481	123.456		1	3	N3	33.6103							1	2	FI	N3	50.4899
13	1	2	RF	N3	28.1732	33.3319	61.5051	45.8063	16.3333	14.5887	77	20.6667	21.983	28.1732		1	3	FI	N1	132.93	132.93	132.93	60	132.93	214.813		2	1	N3	25.043							1	2	RF	N3	46.6647
14	1	2	RF	N1	17.3801	23.8085	41.1886	42.1964	17.6667	9.78103	67.3333	20	12.6184	17.3801		1	3	FI	N2	242.053	242.053	242.053	90	242.053	192.591		2	1	N1	10.928							1	2	RF	N1	51.6168
15	1	2	RF	N0	15.1183	16.1898	31.3081	48.2888	13.3333	8.12323	58.3333	17.6667	9.88043	15.1183		1	3	FI	N3	252.737	252.737	252.737	130	252.737	174.357		2	1	N2	22.5937							1	2	RF	N0	37.8555
16	1	2	RF	N2	21.6656	27.3322	48.9978	44.2176	19	12.2677	71	20.6667	14.5231	21.6656		1	3	RF	N2	51.9443	51.9443	51.9443	90	51.9443	133.332		2	1	N0	11.751							1	2	RF	N2	44.1251
17	1	3	FI	N1	33.2127	30.4987	63.7114	52.1299	19.6667	12.4329	78	19	26.7051	33.2127		1	3	RF	N1	45.2515	48.2515	45.2515	60	5.25149	70.3687		2	2	N0	10.7327							1	3	FI	N1	56.8547
18	1	3	FI	N2	47.0217	21.4276	68.4494	68.6956	14.6667	13.6762	71	21	41.149	47.0217		1	3	RF	N3	73.5054	73.5054	73.5054	130	73.5054	123.7		2	2	N1	12.8793							1	3	FI	N2	48.7598
19	1	3	FI	N0	25.2369	23.8085	49.0454	51.4562	11	8.82738	65.6667	17	21.2688	25.2369		2	1	FI	N3	238.695	238.695	238.695	130	238.695	284.328		2	2	N3	21.1352							1	3	FI	N0	42.7759
20	1	3	FI	N3	58.0927	29.2845	87.3772	66.485	14.6667	15.1682	81.6667	22.6667	51.4264	58.0927		2	1	FI	N1	119.243	79.2429	119.243	60	19.2429	229.627		2	2	N2	19.5941							1	3	FI	N3	45.8076
21	1	3	RF	N0	17.8239	19.6896	37.5136	47.5133	17	7.46011	63.3333	20.3333	8.93542	17.8239		2	1	FI	N2	217.362	217.362	217.362	90	217.362	258.434		2	3	N2	20.6949							1	3	RF	N0	33.8081
22	1	3	RF	N2	22.4989	26.1894	48.6883	46.2101	17.3333	11.9362	74.3333	23	17.8959	22.4989		2	1	RF	N1	69.0197	39.0197	69.0197	60	39.0197	80.7529		2	3	N1	5.23971							1	3	RF	N2	48.49
23	1	3	RF	N1	18.139	28.5702	46.7092	38.8339	17	11.2731	73.3333	27	11.3139	18.139		2	1	RF	N3	91.266	91.266	91.266	130	91.266	99.4921		2	3	N3	26.3194							1	3	RF	N1	46.1567
24	1	3	RF	N3	27.3796	35.4747	62.8543	43.5605	16.3333	14.7544	88	23.6667	23.729	27.3796		2	1	RF	N2	73.649	43.649	73.649	90	43.649	109.629		2	3	N0	4.0839							1	3	RF	N3	55.8071
25	2	1	FI	N3	63.8861	30.951	94.8371	67.364	23.3333	17.709	92	16	56.7435	63.8861		2	2	RF	N1	79.0898	113.09	79.0898	60	113.09	75.554												2	1	FI	N3	81.7425
26	2	1	FI	N1	34.0103	40.4744	74.4848	45.6608	14.3333	11.6379	75.5	12	28.6137	34.0103		2	2	RF	N3	115.22	135.22	115.22	130	135.22	189.286												2	1	FI	N1	61.5847
27	2	1	FI	N2	52.4183	42.8553	95.2736	55.0187	21.6667	14.1207	76.5	12.5	45.4345	52.4183		2	2	RF	N2	91.2656	121.266	91.2656	90	91.2656	118.517												2	1	FI	N2	57.7753
28	2	1	FI	N0	32.8557	42.141	74.9968	43.8095	14.3333	8.03016	70.6667	11.6667	25.7132	32.8557		2	2	FI	N3	233.507	233.507	233.507	130	233.507	221.87												2	1	FI	N0	46.6647
29	2	1	RF	N1	18.2532	18.5706	36.8238	49.569	12.3333	7.16738	59	14.5	15.7136	18.2532		2	2	FI	N2	257.926	257.926	257.926	90	257.926	207.405												2	1	RF	N1	18.2532
30	2	1	RF	N0	15.912	19.0468	34.9588	45.5164	16.6667	6.66878	55.1667	11	12.2614	15.912		2	2	FI	N1	164.676	164.676	164.676	60	164.676	103.703												2	1	RF	N0	16.9834
31	2	1	RF	N3	27.7766	22.1419	49.9185	55.6439	11.3333	10.9069	64.3333	13.3333	24.4434	27.7766		2	3	FI	N2	277.766	277.766	277.766	90	277.766	237.035												2	1	RF	N3	27.7766
32	2	1	RF	N2	19.8404	21.6657	41.5062	47.8011	11.3333	7.79063	63	12.3333	18.4119	19.8404		2	3	FI	N1	127.776	27.7762	127.776	60	27.7762	155.67												2	1	RF	N2	19.8404
33	2	2	RF	N0	11.3091	25.4751	36.7842	30.7444	6	3.17858	58.5	13.3333	9.56311	11.3091		2	3	FI	N3	288.261	288.261	288.261	130	288.261	237.946												2	2	RF	N0	8.09489
34	2	2	RF	N1	18.0945	31.1891	49.2836	36.715	9.33333	7.10506	62.1667	13.1667	15.8723	18.0945		2	3	RF	N2	82.8889	82.8889	82.8889	90	82.8889	77.3655												2	2	RF	N1	18.0945
35	2	2	RF	N3	28.8876	37.1413	66.0289	43.75	13.6667	11.3432	61.1667	10.8333	26.8242	28.8876		2	3	RF	N3	68.9838	68.9838	68.9838	130	68.9838													2	2	RF	N3	28.8876
36	2	2	RF	N2	19.523	35.2366	54.7595	35.6522	10.6667	7.66598	58.3333	13.6667	17.3008	19.523		2	3	RF	N1	59.2567	59.2567	59.2567	60	59.2567													2	2	RF	N2	18.2532
37	2	2	FI	N3	57.1404	41.903	99.0434	57.6923	12.6667	13.9655	75.5	12.3333	55.3944	57.1404																							2	2	FI	N3	24.4434
38	2	2	FI	N2	49.9978	40.9506	90.9485	54.9738	12.6667	12.2198	78.1667	14.6667	46.6647	49.9978																							2	2	FI	N2	37.7762
39	2	2	FI	N0	26.7845	14.5232	41.3077	64.8415	11.6667	7.33188	49.3333	7.33333	24.245	26.7845																							2	2	FI	N0	39.8396
40	2	2	FI	N1	36.6651	36.1889	72.854	50.3268	19	8.96119	59.5	11	29.3638	36.6651																							2	2	FI	N1	51.2676
41	2	3	FI	N2	52.8548	37.6174	90.4723	58.421	16.6667	13.9655	76.5	19.1667	48.4106	52.8548																							2	3	FI	N2	43.8076
42	2	3	FI	N1	29.5225	32.8557	62.3782	47.3282	12	9.31032	67.1667	17.6667	26.348	29.5225																							2	3	FI	N1	34.2842
43	2	3	FI	N3	65.3297	74.2825	139.612	46.7937	20.3333	19.2025	99.8333	28.6667	55.2357	65.3297																							2	3	FI	N3	78.568
44	2	3	FI	N0	27.8559	45.7123	73.5682	37.864	14	8.37929	56.6667	14.1667	23.8878	27.8559																							2	3	FI	N0	39.0459
45	2	3	RF	N2	23.0149	29.0464	52.0613	44.2073	16.6667	9.03713	63.3333	17.5	16.8247	23.0149																							2	3	RF	N2	23.0149
46	2	3	RF	N3	27.3798	22.6181	49.9979	54.7619	13.6667	9.90968	63.6667	12.8333	20.396	27.3798																							2	3	RF	N3	25.237
47	2	3	RF	N0	18.4119	24.7608	43.1727	42.6471	16.6667	7.22971	53.8333	14.3333	9.36468	18.4119																							2	3	RF	N0	18.4119
48	2	3	RF	N1	21.9673	25.237	47.2043	46.5367	16	8.62579	45.3333	12.5	15.6184	21.9673																							2	3	RF	N1	38.7285

[truncated: 3 more sheets: Sheet4, Dry matter, Sheet8]
