# Supplementary material for: Effect of Supplemental Irrigation on Tuber Yield, Water Use Efficiency and Nitrogen Use Efficiency of Potato (Solanum Tuberosum L.) Grown in a Mollic Andosol
Source: Research Square preprint supplement (doi:10.21203/rs.3.rs-427233/v1), 2021-04-27
Supplement: Supplementary file 2 [file 9152115d28269e21cc4b8a3f.xlsx]

## Sheet: Sheet1
		Date	Max Temp (C)	Min Temp (C)	Rainfall			ETo (mm/day)			Date	Max Temp (C)	Min Temp (C)	Rainfall		ETo (mm/day)		Date	Max Temp	Min Temp (C)	Rainfall		ETo (mm/day)		Date	Max Temp	Min Temp (C)	Rainfall	ETo (mm/day)					Date	Max Temp (C)	Mini Temp (C)	Rainfall		ETo (mm/day)		Date	Max Temp (C)	Min Temp( C)	Rainfall		ETo (mm/day)			jan.
					(mm/day)	ETC OCT2	ETC OCT1							(mm/day)	ETC				(C)		(mm/day)	ETC				(C)		(mm/day)		KC	RAIN	ETC					(mm/day)	ETC						(mm/day)	ETC				Rainfall
		2020-10-01	25	11.5	0	4.13	2.205	3.5	0.63		2020-09-01	22.7	9	0	3.92	3.5		2020-08-01	19	9	1.9	2.925	3.9		2020-07-01	23.5	8	0.7	5.7	1.14	0.7	6.498		2020-11-01	25.7	11.2	0	3.12	4		2020-12-01	24.5	12.4	0	4.56	4		2021-01-01	0
		2020-10-02	25.2	11	15	4.72	2.52	4			2020-09-02	21.8	6	0	3.92	3.5		2020-08-02	22.2	9.1	1.2	2.025	2.7		2020-07-02	23.4	9.5	14	4.5	1.14	14	5.13		2020-11-02	25.2	10.6	0	3.12	4		2020-12-02	24.6	10.6	0	3.99	3.5		2021-01-02	0
		2020-10-03	25.7	10.5	18.3	5.074	2.709	4.3			2020-09-03	23.3	7.2	0	4.48	4		2020-08-03	24	12	4.8	2.475	3.3		2020-07-03	23.5	10	43	5	1.14	43	5.7		2020-11-03	23.2	12.4	1.9	1.95	2.5		2020-12-03	24	10.8	0	4.56	4		2021-01-03	0
		2020-10-04	24.5	13.4	14.7	5.546	2.961	4.7			2020-09-04	23.6	7.5	0	4.48	4		2020-08-04	24.5	14	0	2.25	3		2020-07-04	24	10.5	0	4	1.14	0	4.56		2020-11-04	22.2	11.2	0	1.092	1.4		2020-12-04	23.5	11	0	3.42	3		2021-01-04	0
		2020-10-05	22.8	10.7	8.8	3.304	1.764	2.8			2020-09-05	24.4	7.7	7.5	3.92	3.5		2020-08-05	23	13.5	10.8	1.35	1.8		2020-07-05	22.5	11.9	0	3	1.14	0	3.42		2020-11-05	24.1	10.6	2.4	2.34	3		2020-12-05	24.2	10	1.5	4.56	4		2021-01-05	0
		2020-10-06	23	11	2.8	2.714	1.449	2.3			2020-09-06	24.2	8.6	0.6	4.48	4		2020-08-06	24.5	11.5	0.0;	2.25	3		2020-07-06	23	12	6	1	1.14	6	1.14		2020-11-06	24	10	0	2.652	3.4		2020-12-06	23.2	8	0	5.13	4.5		2021-01-06	0
		2020-10-07	23.6	10	2	4.72	2.52	4			2020-09-07	24.7	7.4	0	4.592	4.1		2020-08-07	23.5	10	0	2.625	3.5		2020-07-07	23.2	12.2	11.2	4.2	1.14	11.2	4.788		2020-11-07	24.2	9.7	0	2.34	3		2020-12-07	23	8.5	0	5.7	5		2021-01-07	0
		2020-10-08	25.1	10.2	0	4.72	2.52	4			2020-09-08	26.5	8	0	5.6	5		08-Agu-16	20.5	13	24	3	4		2020-07-08	23	12.5	7.8	1.8	1.14	7.8	2.052		2020-11-08	25	10.9	0	3.12	4		2020-12-08	25.1	10	0	4.56	4		2021-01-08	0
		2020-10-09	25.3	10.1	0	4.72	2.52	4			2020-09-09	24.6	8.5	0	4.48	4		09-Agu-16	20.6	8	0	2.25	3		2020-07-09	20.5	12.7	0.5	3.5	1.14	0.5	3.99		2020-11-09	23.5	10.4	6	2.73	3.5		2020-12-09	24.2	9.8	0	5.13	4.5		2021-01-09	0
		2020-10-10	25.6	10	0	5.9	3.15	5			2020-09-10	26	8.4	0	5.04	4.5		10-Agu-16	21	12	4	2.25	3		2020-07-10	21.4	11.2	1.6	3.1	1.14	1.6	3.534		2020-11-10	23	11	3	2.418	3.1		2020-12-10	24.3	9.5	0	5.7	5		2021-01-10	0
		2020-10-11	26.5	9.6	0	5.31	2.835	4.5			2020-09-11	25.5	8.2	0	5.04	4.5		11-Agu-16	25.5	12.3	0	2.625	3.5		2020-07-11	22.5	10.7	0	4	1.14	0	4.56		2020-11-11	21.1	11	0	1.56	2		2020-12-11	24.2	10.2	0	5.13	4.5		2021-01-11	0
		2020-10-12	24.8	9	0.3	5.074	2.709	4.3			2020-09-12	25.8	8	0	5.6	5		12-Agu-16	25.2	12	2.3	1.725	2.3		2020-07-12	22	12	0	2	1.14	0	2.28		2020-11-12	23	10.5	0	2.73	3.5		2020-12-12	24	9.9	0	4.56	4		2021-01-12	0
		2020-10-13	26	9.5	0	5.31	2.835	4.5			2020-09-13	26.1	7.9	0	5.6	5		13-Agu-16	24.5	14	9.6	1.95	2.6		2020-07-13	18	11	0	2	1.14	0	2.28		2020-11-13	23.5	9	0	3.12	4		2020-12-13	24.5	9.7	2.1	4.674	4.1		2021-01-13	0
		2020-10-14	25.5	9.2	0	5.9	3.15	5			2020-09-14	26.2	10.5	1.2	5.04	4.5		14-Agu-16	24.5	12.5	0	3	4		2020-07-14	21.5	9	1.2	3.2	1.14	1.2	3.648		2020-11-14	24.6	10.4	0	3.51	4.5		2020-12-14	22.7	7.5	0	4.56	4		2021-01-14	0
		2020-10-15	25.6	9.3	0	5.31	2.835	4.5			2020-09-15	25.6	10	7.4	4.704	4.2		15-Agu-16	23	14.5	4	2.625	3.5		2020-07-15	20	9	1.4	3.9	1.14	1.4	4.446		2020-11-15	23.4	10	0	2.73	3.5		2020-12-15	23.2	8.4	0	5.13	4.5		2021-01-15	0
		2020-10-16	25.6	9.4	0	5.9	3.15	5			2020-09-16	25.2	9.5	1.7	3.248	2.9		16-Agu-16	25.5	13.5	5.8	6	8		2020-07-16	20	10.5	0	3.5	1.14	0	3.99		2020-11-16	21.4	10.2	0.2	1.56	2		2020-12-16	24.5	9.5	0	5.7	5		2021-01-16	0
		2020-10-17	25.8	9.5	0.7	4.956	2.646	4.2			2020-09-17	24.5	9.5	1.2	5.264	4.7		17-Agu-16	23	13	0	3	4		2020-07-17	21	10	15.5	4.5	1.14	15.5	5.13		2020-11-17	22.5	10	3.3	1.326	1.7		2020-12-17	24.7	9	0	6.27	5.5		2021-01-17	0
		2020-10-18	25.6	11.4	0	5.31	2.835	4.5			2020-09-18	25.1	9.2	0	5.264	4.7		18-Agu-16	23.6	15	0	2.25	3		2020-07-18	24	9.5	4.4	2.9	1.14	4.4	3.306		2020-11-18	22.7	10.3	0.5	1.014	1.3		2020-12-18	25	8	0	6.84	6		2021-01-18	0
		2020-10-19	26	11.5	0.5	4.13	2.205	3.5			2020-09-19	25.4	9.7	0	4.48	4		19-Agu-16	26	13	0	3	4		2020-07-19	22	8.5	0.7	2.7	1.14	0.7	3.078		2020-11-19	21.4	10.5	14	1.95	2.5		2020-12-19	25.1	7.7	0	6.84	6		2021-01-19	0
		2020-10-20	27	10	0	4.13	2.205	3.5			2020-09-20	24.6	10	3.4	4.48	4		20-Agu-16	24	10	19.2	2.4	3.2		2020-07-20	22.5	11	7.6	4.6	1.14	7.6	5.244		2020-11-20	21.8	10.4	0	2.73	3.5		2020-12-20	24.5	7.5	0	5.13	4.5		2021-01-20	0
		2020-10-21	27.1	9	0	5.31	2.835	4.5			2020-09-21	23.8	10.4	10.6	4.928	4.4		21-Agu-16	23.5	12.5	0	2.625	3.5		2020-07-21	23	10	10.9	3.4	1.14	10.9	3.876		2020-11-21	22.2	12.5	0.8	2.73	3.5		2020-12-21	24	9.2	0	5.13	4.5		2021-01-21	0
		2020-10-22	25.5	9.5	0	5.9	3.15	5			2020-09-22	23.7	12.5	0	5.152	4.6		22-Agu-16	24	14	0	3	4		2020-07-22	22.5	11.5	3.3	2.3	1.14	3.3	2.622		2020-11-22	22	10.7	2.6	2.184	2.8		2020-12-22	24	10.5	0	3.99	3.5		2021-01-22	0
		2020-10-23	25.7	9.6	0	5.31	2.835	4.5			2020-09-23	23.1	9.4	0.5	3.36	3		23-Agu-16	24.5	15	16.5	2.25	3		2020-07-23	21.5	9.3	1.2	4.2	1.14	1.2	4.788		2020-11-23	18.5	13.4	1	0.468	0.6		2020-12-23	23	10.2	0	3.99	3.5		2021-01-23	0
		2020-10-24	25.5	10	0	4.13	2.205	3.5			2020-09-24	25	9.6	6	4.48	4		24-Agu-16	22.5	14.5	4	1.5	2		2020-07-24	21.5	9	0	3.5	1.14	0	3.99		2020-11-24	23.7	11	0	2.34	3		2020-12-24	25	9.8	0	4.56	4		2021-01-24	0
		2020-10-25	25.5	11.7	0	4.13	2.205	3.5			2020-09-25	24.2	9.9	35	4.48	4		25-Agu-16	23	12.5	0	3	4		2020-07-25	21	11	0	2.5	1.14	0	2.85		2020-11-25	24	12	4.5	2.73	3.5		2020-12-25	25.1	9.6	0	5.13	4.5		2021-01-25	0
		2020-10-26	24.5	11.7	0	4.72	2.52	4			2020-09-26	25	10.7	0.3	5.04	4.5		2020-08-26	23	10.5	0	2.25	3		2020-07-26	22	8	0	3	1.14	0	3.42		2020-11-26	25	11.2	6	2.34	3		2020-12-26	25.2	9.3	0	5.13	4.5		2021-01-26	0
		2020-10-27	25	9.1	0	4.72	2.52	4			2020-09-27	23.9	10.5	17.8	4.256	3.8		2020-08-27	23	9.5	0	3	4		2020-07-27	20.5	9	16	5	1.14	16	5.7		2020-11-27	24.9	10.5	4.5	2.418	3.1		2020-12-27	25	9	0	4.56	4		2021-01-27	0
		2020-10-28	24	10.4	0	4.13	2.205	3.5			2020-09-28	24.2	11.4	7.8	5.936	5.3		2020-08-28	22.9	8.5	0	3	4		2020-07-28	21	12.5	9.7	4.7	1.14	9.7	5.358		2020-11-28	25.4	11.7	13	2.34	3		2020-12-28	25.4	8.7	0	5.13	4.5		2021-01-28	0
		2020-10-29	24.4	10	0	3.658	1.953	3.1			2020-09-29	24.6	10.4	0	4.816	4.3		2020-08-29	24	7.5	0	3.375	4.5		2020-07-29	20	10	0	3	1.14	0	3.42		2020-11-29	24.7	9.5	11.5	3.9	5		2020-12-29	26.1	11.9	0	4.56	4		2021-01-29	0
		2020-10-30	25.9	9.5	0	4.13	2.205	3.5			2020-09-30	24.9	10.2	0	4.48	4		2020-08-30	23	9.2	0	3.375	4.5		2020-07-30	23.5	9.5	7.6	3.6	1.14	7.6	4.104		2020-11-30	24	10	0	2.73	3.5		2020-12-30	24.5	12.9	0	3.99	3.5		2021-01-30	0
		2020-10-31	25.5	9.4	0	3.54	1.89	3										2020-08-31	23.6	10.5	3	1.875	2.5		2020-07-31	23.8	11	1.5	4	1.14	1.5	4.56									2020-12-31	24.2	12.4	0	4.56	4		2021-01-31	3.4
																														1.14
															382.9															1.14
																														1.14
																														1.14				119.72
																														1.14
																														1.14
																														1.14
																														1.14
																														1.14
																														1.14				343.355
																														1.14
																														1.14
																														1.14
																														1.14
																														1.14
																														1.14
																														1.14
																														1.14
																														1.14
																														1.14
																														1.14
																														1.14
																														1.14
																														1.14
																														1.14
																														1.14
																														1.14
																														1.14
																														1.14
																														1.14
																														1.14
																														1.14
																														1.14
																														1.14
																														1.14
																														1.14
																														1.14
																														1.14
																														1.14
																														1.14
																														1.14
																														1.14
																														1.14
																														1.14
																														1.14
																														1.14
																														1.14
																														1.14
																														1.14
																														1.14
																														1.14
																														1.14
																														1.14
																														1.14
																														1.14
																														1.14
																														1.14
																														1.14
																														1.14
																														1.14
																														1.14
																														1.14
																														1.14
																														1.14
																														1.14
																														1.14
																														1.14
																														1.14
																														1.14
																														1.14
																														1.14
																														1.14
																														1.14
																														1.14
																														1.14
																														1.14
																														1.14
																														1.14
																														1.14
																														1.14
																														1.14
																														1.14
																														1.14
																														1.14
																														1.14
																														1.14
																														1.14
																														1.14
																														1.14
																														1.14
																														1.14
																														1.14
																														1.14
																														1.14
																														1.14
																														1.14
																														1.14
																														1.14
																														1.14
																														1.14
																														1.14
																														1.14
																														1.14
																														1.14
																														1.14
																														1.14
																														1.14
																														1.14
																														1.14
																														1.14
																														1.14
																														1.14
																														1.14
																														1.14
																														1.14
																														1.14
																														1.14
																														1.14
																														1.14
																														1.14
																														1.14
																														1.14
																														1.14
																														1.14
																														1.14
																														1.14
																														1.14
																														1.14
																														1.14
																														1.14
																														1.14
																														1.14
																														1.14
																														1.14
																														1.14
																														1.14
																														1.14
																														1.14
																														1.14
																														1.14
																														1.14
																														1.14
																														1.14
																														1.14
																														1.14
																														1.14
																														1.14
																														1.14
																														1.14
																														1.14
																														1.14
																														1.14
																														1.14
																														1.14
																														1.14
																														1.14
																														1.14
																														1.14
																														1.14
																														1.14
																														1.14
																														1.14
																														1.14
																														1.14
																														1.14
																														1.14
																														1.14
																														1.14
																														1.14
																														1.14
																														1.14
																														1.14
																														1.14
																														1.14
																														1.14
																														1.14
																														1.14
																														1.14
																														1.14
																														1.14
																														1.14
																														1.14
																														1.14
																														1.14
																														1.14
																														1.14
																														1.14
																														1.14
																														1.14
																														1.14
																														1.14
																														1.14
																														1.14
																														1.14
																														1.14
																														1.14
																														1.14
																														1.14
																														1.14
																														1.14
																														1.14
																														1.14
																														1.14
																														1.14
																														1.14
																														1.14
																														1.14
																														1.14
																														1.14
																														1.14
																														1.14
																														1.14
																														1.14
																														1.14
																														1.14
																														1.14
																														1.14
																														1.14
																														1.14
																														1.14
																														1.14
																														1.14
																														1.14
																														1.14
																														1.14
																														1.14
																														1.14
																														1.14
																														1.14
																														1.14
																														1.14
																														1.14
																														1.14
																														1.14
																														1.14
																														1.14
																														1.14
																														1.14
																														1.14
																														1.14
																														1.14
																														1.14
																														1.14
																														1.14
																														1.14
																														1.14
																														1.14
																														1.14
																														1.14
																														1.14
																														1.14
																														1.14
																														1.14
																														1.14
																														1.14
																														1.14
																														1.14
																														1.14
																														1.14
																														1.14
																														1.14
																														1.14
																														1.14
																														1.14
																														1.14
																														1.14
																														1.14
																														1.14
																														1.14
																														1.14
																														1.14
																														1.14
																														1.14
																														1.14
																														1.14
																														1.14
																														1.14
																														1.14
																														1.14
																														1.14
																														1.14
																														1.14
																														1.14
																														1.14
																														1.14
																														1.14
																														1.14
																														1.14
																														1.14
																														1.14
																														1.14
																														1.14
																														1.14
																														1.14
																														1.14
																														1.14
																														1.14
																														1.14
																														1.14
																														1.14
																														1.14
																														1.14
																														1.14
																														1.14
																														1.14
																														1.14
																														1.14
																														1.14
																														1.14
																														1.14
																														1.14
																														1.14
																														1.14
																														1.14
																														1.14
																														1.14
																														1.14
																														1.14
																														1.14
																														1.14
																														1.14
																														1.14
																														1.14
																														1.14
																														1.14
																														1.14
																														1.14
																														1.14
																														1.14
																														1.14
																														1.14
																														1.14
																														1.14
																														1.14
																														1.14
																														1.14
																														1.14
																														1.14
																														1.14
																														1.14
																														1.14
																														1.14
																														1.14
																														1.14
																														1.14
																														1.14
																														1.14
																														1.14
																														1.14
																														1.14
																														1.14
																														1.14
																														1.14
																														1.14
																														1.14
																														1.14
																														1.14
																														1.14
																														1.14
																														1.14
																														1.14
																														1.14
																														1.14
																														1.14
																														1.14
																														1.14
																														1.14
																														1.14
																														1.14
																														1.14
																														1.14
																														1.14
																														1.14
																														1.14
																														1.14
																														1.14
																														1.14
																														1.14
																														1.14
																														1.14
																														1.14
																														1.14
																														1.14
																														1.14
																														1.14
																														1.14
																														1.14
																														1.14
																														1.14
																														1.14
																														1.14
																														1.14
																														1.14
																														1.14
																														1.14
																														1.14
																														1.14
																														1.14
																														1.14
																														1.14
																														1.14
																														1.14
																														1.14
																														1.14
																														1.14
																														1.14
																														1.14
																														1.14
																														1.14
																														1.14
																														1.14
																														1.14
																														1.14
																														1.14
																														1.14
																														1.14
																														1.14
																														1.14
																														1.14
																														1.14
																														1.14
																														1.14
																														1.14
																														1.14
																														1.14
																														1.14
																														1.14
																														1.14
																														1.14
																														1.14
																														1.14
																														1.14
																														1.14
																														1.14
																														1.14
																														1.14
																														1.14
																														1.14
																														1.14
																														1.14
																														1.14
																														1.14
																														1.14
																														1.14
																														1.14
																														1.14
																														1.14
																														1.14
																														1.14
																														1.14
																														1.14
																														1.14
																														1.14
																														1.14
																														1.14
																														1.14
																														1.14
																														1.14
																														1.14
																														1.14
																														1.14
																														1.14
																														1.14
																														1.14
																														1.14
																														1.14
																														1.14
																														1.14
																														1.14
																														1.14
																														1.14
																														1.14
																														1.14
																														1.14
																														1.14
																														1.14
																														1.14
																														1.14
																														1.14
																														1.14
																														1.14
																														1.14
																														1.14
																														1.14
																														1.14
																														1.14
																														1.14
																														1.14
																														1.14
																														1.14
																														1.14
																														1.14
																														1.14
																														1.14
																														1.14
																														1.14
																														1.14
																														1.14
																														1.14
																														1.14
																														1.14
																														1.14
																														1.14
																														1.14
																														1.14
																														1.14
																														1.14
																														1.14
																														1.14
																														1.14
																														1.14
																														1.14
																														1.14
																														1.14
																														1.14
																														1.14
																														1.14
																														1.14
																														1.14
																														1.14
																														1.14
																														1.14
																														1.14
																														1.14
																														1.14
																														1.14
																														1.14
																														1.14
																														1.14
																														1.14
																														1.14
																														1.14
																														1.14
																														1.14
																														1.14
																														1.14
																														1.14
																														1.14
																														1.14
																														1.14
																														1.14
																														1.14
																														1.14
																														1.14
																														1.14
																														1.14
																														1.14
																														1.14
																														1.14
																														1.14
																														1.14
																														1.14
																														1.14
																														1.14
																														1.14
																														1.14
																														1.14
																														1.14
																														1.14
																														1.14
																														1.14
																														1.14
																														1.14
																														1.14
																														1.14
																														1.14
																														1.14
																														1.14
																														1.14
																														1.14
																														1.14
																														1.14
																														1.14
																														1.14
																														1.14
																														1.14
																														1.14
																														1.14
																														1.14
																														1.14
																														1.14
																														1.14
																														1.14
																														1.14
																														1.14
																														1.14
																														1.14
																														1.14
																														1.14
																														1.14
																														1.14
																														1.14
																														1.14
																														1.14
																														1.14
																														1.14
																														1.14
																														1.14
																														1.14
																														1.14
																														1.14
																														1.14
																														1.14
																														1.14
																														1.14
																														1.14
																														1.14
																														1.14
																														1.14
																														1.14
																														1.14
																														1.14
																														1.14
																														1.14
																														1.14
																														1.14
																														1.14
																														1.14
																														1.14
																														1.14
																														1.14
																														1.14
																														1.14
																														1.14
																														1.14
																														1.14
																														1.14
																														1.14
																														1.14
																														1.14
																														1.14
																														1.14
																														1.14
																														1.14
																														1.14
																														1.14
																														1.14
																														1.14
																														1.14
																														1.14
																														1.14
																														1.14
																														1.14
																														1.14
																														1.14
																														1.14
																														1.14
																														1.14
																														1.14
																														1.14
																														1.14
																														1.14
																														1.14
																														1.14
																														1.14
																														1.14
																														1.14
																														1.14
																														1.14
																														1.14
																														1.14
																														1.14
																														1.14
																														1.14
																														1.14
																														1.14
																														1.14
																														1.14
																														1.14
																														1.14
																														1.14
																														1.14
																														1.14
																														1.14
																														1.14
																														1.14
																														1.14
																														1.14
																														1.14
																														1.14
																														1.14
																														1.14
																														1.14
																														1.14
																														1.14
																														1.14
																														1.14
																														1.14
																														1.14
																														1.14
																														1.14
																														1.14
																														1.14
																														1.14
																														1.14
																														1.14
																														1.14
																														1.14
																														1.14
																														1.14
																														1.14
																														1.14
																														1.14
																														1.14
																														1.14
																														1.14
																														1.14
																														1.14
																														1.14
																														1.14
																														1.14
																														1.14
																														1.14
																														1.14
																														1.14
																														1.14
																														1.14
																														1.14
																														1.14
																														1.14
																														1.14
																														1.14
																														1.14
																														1.14
																														1.14
																														1.14
																														1.14
																														1.14
																														1.14
																														1.14
																														1.14
																														1.14
																														1.14
																														1.14
																														1.14
																														1.14
																														1.14
																														1.14
																														1.14
																														1.14
																														1.14
																														1.14
																														1.14
																														1.14
																														1.14
																														1.14
																														1.14
																														1.14
																														1.14
																														1.14
																														1.14
																														1.14
																														1.14
																														1.14
																														1.14
																														1.14
																														1.14
																														1.14
																														1.14
																														1.14
																														1.14
																														1.14
																														1.14
																														1.14
																														1.14
																														1.14
																														1.14
																														1.14
																														1.14
																														1.14
																														1.14
																														1.14
																														1.14
																														1.14
																														1.14
																														1.14
																														1.14
																														1.14
																														1.14
																														1.14
																														1.14
																														1.14
																														1.14
																														1.14
																														1.14
																														1.14
																														1.14
																														1.14
																														1.14
																														1.14
																														1.14
																														1.14
																														1.14
																														1.14
																														1.14
																														1.14
																														1.14
																														1.14
																														1.14
																														1.14
																														1.14
																														1.14
																														1.14
																														1.14
																														1.14
																														1.14
																														1.14
																														1.14
																														1.14
																														1.14
																														1.14
																														1.14
																														1.14
																														1.14
																														1.14
																														1.14
																														1.14
																														1.14
																														1.14
																														1.14
																														1.14
																														1.14
																														1.14
																														1.14
																														1.14
																														1.14
																														1.14
																														1.14
																														1.14
																														1.14
																														1.14
																														1.14
																														1.14
																														1.14
																														1.14
																														1.14
																														1.14
																														1.14
																														1.14
																														1.14
																														1.14
																														1.14
																														1.14
																														1.14
																														1.14
																														1.14
																														1.14
																														1.14
																														1.14
																														1.14
																														1.14
																														1.14
																														1.14
																														1.14
																														1.14
																														1.14
																														1.14
																														1.14
																														1.14
																														1.14
																														1.14
																														1.14
																														1.14
																														1.14
																														1.14
																														1.14
																														1.14
																														1.14
																														1.14
																														1.14
																														1.14
																														1.14
																														1.14
																														1.14
																														1.14
																														1.14
																														1.14
																														1.14
																														1.14
																														1.14
																														1.14
																														1.14
																														1.14
																														1.14
																														1.14
																														1.14
																														1.14
																														1.14
																														1.14
																														1.14
																														1.14
																														1.14
																														1.14
																														1.14
																														1.14
																														1.14
																														1.14
																														1.14
																														1.14
																														1.14
																														1.14
																														1.14
																														1.14
																														1.14
																														1.14
																														1.14
																														1.14
																														1.14
																														1.14
																														1.14
																														1.14
																														1.14
																														1.14
																														1.14
																														1.14
																														1.14
																														1.14
																														1.14
																														1.14
																														1.14
																														1.14
																														1.14
																														1.14
																														1.14
																														1.14
																														1.14
																														1.14
																														1.14
																														1.14
																														1.14
																														1.14
																														1.14
																														1.14
																														1.14
																														1.14
																														1.14
																														1.14
																														1.14
																														1.14
																														1.14
																														1.14
																														1.14
																														1.14
																														1.14
																														1.14
																														1.14
																														1.14
																														1.14
																														1.14
																														1.14
																														1.14
																														1.14
																														1.14
																														1.14
																														1.14
																														1.14
																														1.14
																														1.14
																														1.14
																														1.14
																														1.14
																														1.14
																														1.14
																														1.14
																														1.14
																														1.14
																														1.14
																														1.14
																														1.14
																														1.14
																														1.14
																														1.14
																														1.14
																														1.14
																														1.14
																														1.14
																														1.14
																														1.14
																														1.14
																														1.14
																														1.14
																														1.14
																														1.14
																														1.14
																														1.14
																														1.14
																														1.14
																														1.14
																														1.14
																														1.14
																														1.14
																														1.14
																														1.14
																														1.14
																														1.14
																														1.14
																														1.14
																														1.14
																														1.14
																														1.14
																														1.14
																														1.14
																														1.14
																														1.14
																														1.14
																														1.14
																														1.14
																														1.14
																														1.14
																														1.14
																														1.14
																														1.14
																														1.14
																														1.14
																														1.14
																														1.14
																														1.14
																														1.14
																														1.14
																														1.14
																														1.14
																														1.14
																														1.14
																														1.14
																														1.14
																														1.14
																														1.14
																														1.14
																														1.14
																														1.14
																														1.14
																														1.14
																														1.14
																														1.14
																														1.14
																														1.14
																														1.14
																														1.14
																														1.14
																														1.14
																														1.14
																														1.14
																														1.14
																														1.14
																														1.14
																														1.14
																														1.14
																														1.14
																														1.14
																														1.14
																														1.14
																														1.14
																														1.14
																														1.14
																														1.14
																														1.14
																														1.14
																														1.14
																														1.14
																														1.14
																														1.14
																														1.14
																														1.14
																														1.14
																														1.14
																														1.14
																														1.14
																														1.14
																														1.14
																														1.14
																														1.14
																														1.14
																														1.14
																														1.14
																														1.14
																														1.14
																														1.14
																														1.14
																														1.14
																														1.14
																														1.14
																														1.14
																														1.14
																														1.14
																														1.14
																														1.14
																														1.14
																														1.14
																														1.14
																														1.14
																														1.14
																														1.14
																														1.14
																														1.14
																														1.14
																														1.14
																														1.14
																														1.14
																														1.14
																														1.14
																														1.14
																														1.14
																														1.14
																														1.14
																														1.14
																														1.14
																														1.14
																														1.14
																														1.14
																														1.14
																														1.14
																														1.14
																														1.14
																														1.14
																														1.14
																														1.14
																														1.14
																														1.14
																														1.14
																														1.14
																														1.14
																														1.14
																														1.14
																														1.14
																														1.14
																														1.14
																														1.14
																														1.14
																														1.14
																														1.14
																														1.14
																														1.14
																														1.14
																														1.14
																														1.14
																														1.14
																														1.14
																														1.14
																														1.14
																														1.14
																														1.14
																														1.14
																														1.14
																														1.14
																														1.14
																														1.14
																														1.14
																														1.14
																														1.14
																														1.14
																														1.14
																														1.14
																														1.14
																														1.14
																														1.14
																														1.14
																														1.14
																														1.14
																														1.14
																														1.14
																														1.14
																														1.14
																														1.14
																														1.14
																														1.14
																														1.14
																														1.14
																														1.14
																														1.14
																														1.14
																														1.14
																														1.14
																														1.14
																														1.14
																														1.14
																														1.14
																														1.14
																														1.14
																														1.14
																														1.14
																														1.14
																														1.14
																														1.14
																														1.14
																														1.14
																														1.14
																														1.14
																														1.14
																														1.14
																														1.14
																														1.14
																														1.14
																														1.14
																														1.14
																														1.14
																														1.14
																														1.14
																														1.14
																														1.14
																														1.14
																														1.14
																														1.14
																														1.14
																														1.14
																														1.14
																														1.14
																														1.14
																														1.14
																														1.14
																														1.14
																														1.14
																														1.14
																														1.14
																														1.14
																														1.14
																														1.14
																														1.14
																														1.14
																														1.14
																														1.14
																														1.14
																														1.14
																														1.14
																														1.14
																														1.14
																														1.14
																														1.14
																														1.14
																														1.14
																														1.14
																														1.14
																														1.14
																														1.14
																														1.14
																														1.14
																														1.14
																														1.14
																														1.14
																														1.14
																														1.14
																														1.14
																														1.14
																														1.14
																														1.14
																														1.14
																														1.14
																														1.14
																														1.14
																														1.14
																														1.14
																														1.14
																														1.14
																														1.14
																														1.14
																														1.14
																														1.14
																														1.14
																														1.14
																														1.14
																														1.14
																														1.14
																														1.14
																														1.14
																														1.14
																														1.14
																														1.14
																														1.14
																														1.14
																														1.14
																														1.14
																														1.14
																														1.14
																														1.14
																														1.14
																														1.14
																														1.14
																														1.14
																														1.14
																														1.14
																														1.14
																														1.14
																														1.14
																														1.14
																														1.14
																														1.14
																														1.14
																														1.14
																														1.14
																														1.14
																														1.14
																														1.14
																														1.14
																														1.14
																														1.14
																														1.14
																														1.14
																														1.14
																														1.14
																														1.14
																														1.14
																														1.14
																														1.14
																														1.14
																														1.14
																														1.14
																														1.14
																														1.14
																														1.14
																														1.14
																														1.14
																														1.14
																														1.14
																														1.14
																														1.14
																														1.14
																														1.14
																														1.14
																														1.14
																														1.14
																														1.14
																														1.14
																														1.14
																														1.14
																														1.14
																														1.14
																														1.14
																														1.14
																														1.14
																														1.14
																														1.14
																														1.14
																														1.14
																														1.14
																														1.14
																														1.14
																														1.14
																														1.14
																														1.14
																														1.14
																														1.14
																														1.14
																														1.14
																														1.14
																														1.14
																														1.14
																														1.14
																														1.14
																														1.14
																														1.14
																														1.14
																														1.14
																														1.14
																														1.14
																														1.14
																														1.14
																														1.14
																														1.14
																														1.14
																														1.14
																														1.14
																														1.14
																														1.14
																														1.14
																														1.14
																														1.14
																														1.14
																														1.14
																														1.14
																														1.14
																														1.14
																														1.14
																														1.14
																														1.14
																														1.14
																														1.14
																														1.14
																														1.14
																														1.14
																														1.14
																														1.14
																														1.14
																														1.14
																														1.14
																														1.14
																														1.14
																														1.14
																														1.14
																														1.14
																														1.14
																														1.14
																														1.14
																														1.14
																														1.14
																														1.14
																														1.14
																														1.14
																														1.14
																														1.14
																														1.14
																														1.14
																														1.14
																														1.14
																														1.14
																														1.14
																														1.14
																														1.14
																														1.14
																														1.14
																														1.14
																														1.14
																														1.14
																														1.14
																														1.14
																														1.14
																														1.14
																														1.14
																														1.14
																														1.14
																														1.14
																														1.14
																														1.14
																														1.14
																														1.14
																														1.14
																														1.14
																														1.14
																														1.14
																														1.14
																														1.14
																														1.14
																														1.14
																														1.14
																														1.14
																														1.14
																														1.14
																														1.14
																														1.14
																														1.14
																														1.14
																														1.14
																														1.14
																														1.14
																														1.14
																														1.14
																														1.14
																														1.14
																														1.14
																														1.14
																														1.14
																														1.14
																														1.14
																														1.14
																														1.14
																														1.14
																														1.14
																														1.14
																														1.14
																														1.14
																														1.14
																														1.14
																														1.14
																														1.14
																														1.14
																														1.14
																														1.14
																														1.14
																														1.14
																														1.14
																														1.14
																														1.14
																														1.14
																														1.14
																														1.14
																														1.14
																														1.14
																														1.14
																														1.14
																														1.14
																														1.14
																														1.14
																														1.14
																														1.14
																														1.14
																														1.14
																														1.14
																														1.14
																														1.14
																														1.14
																														1.14
																														1.14
																														1.14
																														1.14
																														1.14
																														1.14
																														1.14
																														1.14
																														1.14
																														1.14
																														1.14
																														1.14
																														1.14
																														1.14
																														1.14
																														1.14
																														1.14
																														1.14
																														1.14
																														1.14
																														1.14
																														1.14
																														1.14
																														1.14
																														1.14
																														1.14
																														1.14
																														1.14
																														1.14
																														1.14
																														1.14
																														1.14
																														1.14
																														1.14
																														1.14
																														1.14
																														1.14
																														1.14
																														1.14
																														1.14
																														1.14
																														1.14
																														1.14
																														1.14
																														1.14
																														1.14
																														1.14
																														1.14
																														1.14
																														1.14
																														1.14
																														1.14
																														1.14
																														1.14
																														1.14
																														1.14
																														1.14
																														1.14
																														1.14
																														1.14
																														1.14
																														1.14
																														1.14
																														1.14
																														1.14
																														1.14
																														1.14
																														1.14
																														1.14
																														1.14
																														1.14
																														1.14
																														1.14
																														1.14
																														1.14
																														1.14
																														1.14
																														1.14
																														1.14
																														1.14
																														1.14
																														1.14
																														1.14
																														1.14
																														1.14
																														1.14
																														1.14
																														1.14
																														1.14
																														1.14
																														1.14
																														1.14
																														1.14
																														1.14
																														1.14
																														1.14
																														1.14
																														1.14
																														1.14
																														1.14
																														1.14
																														1.14
																														1.14
																														1.14
																														1.14
																														1.14
																														1.14
																														1.14
																														1.14
																														1.14
																														1.14
																														1.14
																														1.14
																														1.14
																														1.14
																														1.14
																														1.14
																														1.14
																														1.14
																														1.14
																														1.14
																														1.14
																														1.14
																														1.14
																														1.14
																														1.14
																														1.14
																														1.14
																														1.14
																														1.14
																														1.14
																														1.14
																														1.14
																														1.14
																														1.14
																														1.14
																														1.14
																														1.14
																														1.14
																														1.14
																														1.14
																														1.14
																														1.14
																														1.14
																														1.14
																														1.14
																														1.14
																														1.14
																														1.14
																														1.14
																														1.14
																														1.14
																														1.14
																														1.14
																														1.14
																														1.14
																														1.14
																														1.14
																														1.14
																														1.14
																														1.14
																														1.14
																														1.14
																														1.14
																														1.14
																														1.14
																														1.14
																														1.14
																														1.14
																														1.14
																														1.14
																														1.14
																														1.14
																														1.14
																														1.14
																														1.14
																														1.14
																														1.14
																														1.14
																														1.14
																														1.14
																														1.14
																														1.14
																														1.14
																														1.14
																														1.14
																														1.14
																														1.14
																														1.14
																														1.14
																														1.14
																														1.14
																														1.14
																														1.14
																														1.14
																														1.14
																														1.14
																														1.14
																														1.14
																														1.14
																														1.14
																														1.14
																														1.14
																														1.14
																														1.14
																														1.14
																														1.14
																														1.14
																														1.14
																														1.14
																														1.14
																														1.14
																														1.14
																														1.14
																														1.14
																														1.14
																														1.14
																														1.14
																														1.14
																														1.14
																														1.14
																														1.14
																														1.14
																														1.14
																														1.14
																														1.14
																														1.14
																														1.14
																														1.14
																														1.14
																														1.14
																														1.14
																														1.14
																														1.14
																														1.14
																														1.14
																														1.14
																														1.14
																														1.14
																														1.14
																														1.14
																														1.14
																														1.14
																														1.14
																														1.14
																														1.14
																														1.14
																														1.14
																														1.14
																														1.14
																														1.14
																														1.14
																														1.14
																														1.14
																														1.14
																														1.14
																														1.14
																														1.14
																														1.14
																														1.14
																														1.14
																														1.14
																														1.14
																														1.14
																														1.14
																														1.14
																														1.14
																														1.14
																														1.14
																														1.14
																														1.14
																														1.14
																														1.14
																														1.14
																														1.14
																														1.14
																														1.14
																														1.14
																														1.14
																														1.14
																														1.14
																														1.14
																														1.14
																														1.14
																														1.14
																														1.14
																														1.14
																														1.14
																														1.14
																														1.14
																														1.14
																														1.14
																														1.14
																														1.14
																														1.14
																														1.14
																														1.14
																														1.14
																														1.14
																														1.14
																														1.14
																														1.14
																														1.14
																														1.14
																														1.14
																														1.14
																														1.14
																														1.14
																														1.14
																														1.14
																														1.14
																														1.14
																														1.14
																														1.14
																														1.14
																														1.14
																														1.14
																														1.14
																														1.14
																														1.14
																														1.14
																														1.14
																														1.14
																														1.14
																														1.14
																														1.14
																														1.14
																														1.14
																														1.14
																														1.14
																														1.14
																														1.14
																														1.14
																														1.14
																														1.14
																														1.14
																														1.14
																														1.14
																														1.14
																														1.14
																														1.14
																														1.14
																														1.14
																														1.14
																														1.14
																														1.14
																														1.14
																														1.14
																														1.14
																														1.14
																														1.14
																														1.14
																														1.14
																														1.14
																														1.14
																														1.14
																														1.14
																														1.14
																														1.14
																														1.14
																														1.14
																														1.14
																														1.14
																														1.14
																														1.14
																														1.14
																														1.14
																														1.14
																														1.14
																														1.14
																														1.14
																														1.14
																														1.14
																														1.14
																														1.14
																														1.14
																														1.14
																														1.14
																														1.14
																														1.14
																														1.14
																														1.14
																														1.14
																														1.14
																														1.14
																														1.14
																														1.14
																														1.14
																														1.14
																														1.14
																														1.14
																														1.14
																														1.14
																														1.14
																														1.14
																														1.14
																														1.14
																														1.14
																														1.14
																														1.14
																														1.14
																														1.14
																														1.14
																														1.14
																														1.14
																														1.14
																														1.14
																														1.14
																														1.14
																														1.14
																														1.14
																														1.14
																														1.14
																														1.14
																														1.14
																														1.14
																														1.14
																														1.14
																														1.14
																														1.14
																														1.14
																														1.14
																														1.14
																														1.14
																														1.14
																														1.14
																														1.14
																														1.14
																														1.14
																														1.14
																														1.14
																														1.14
																														1.14
																														1.14
																														1.14
																														1.14
																														1.14
																														1.14
																														1.14
																														1.14
																														1.14
																														1.14
																														1.14
																														1.14
																														1.14
																														1.14
																														1.14
																														1.14
																														1.14
																														1.14
																														1.14
																														1.14
																														1.14
																														1.14
																														1.14
																														1.14
																														1.14
																														1.14
																														1.14
																														1.14
																														1.14
																														1.14
																														1.14
																														1.14
																														1.14
																														1.14
																														1.14
																														1.14
																														1.14
																														1.14
																														1.14
																														1.14
																														1.14
																														1.14
																														1.14
																														1.14
																														1.14
																														1.14
																														1.14
[truncated: 1,046,576+ more rows]
[truncated: 2 more columns]
